# Supplementary material
Source: PubMed Central journal article supplement (PMC9482663)
Supplement: NIHMS1799857-supplement-Supp_Figs_TOC.pdf [file NIHMS1799857-supplement-Supp_Figs_TOC.pdf]

Table of Contents: Supplemental Forest plots of meta-analyses on the associations between prenatal, birth, and postnatal factors and ADHD

|                                                                                           |    |
|-------------------------------------------------------------------------------------------|----|
| Figure S1. Pre-pregnancy weight and ADHD overall, dichotomous outcomes .....              | 2  |
| Figure S2. Preeclampsia and ADHD overall, dichotomous outcomes .....                      | 3  |
| Figure S3. Preeclampsia and ADHD diagnosis, dichotomous outcomes .....                    | 4  |
| Figure S4. Pregnancy complications and ADHD overall, dichotomous outcomes .....           | 5  |
| Figure S5. Pregnancy complications and ADHD diagnosis, dichotomous outcomes .....         | 6  |
| Figure S6. Prenatal testosterone and ADHD overall, continuous outcomes .....              | 7  |
| Figure S7. Prenatal testosterone and ADHD diagnosis, continuous outcomes .....            | 8  |
| Figure S8. Prenatal testosterone and inattention, continuous outcomes .....               | 9  |
| Figure S9. Prenatal testosterone and hyperactivity/impulsivity, continuous outcomes ..... | 10 |
| Figure S10. Perinatal asphyxia and ADHD overall, dichotomous outcomes .....               | 11 |
| Figure S11. Perinatal asphyxia and ADHD diagnosis, dichotomous outcomes .....             | 12 |
| Figure S12. Labor complications and ADHD overall, dichotomous outcomes .....              | 13 |
| Figure S13. Labor complications and ADHD overall, continuous outcomes .....               | 14 |
| Figure S14. Mode of delivery and ADHD overall, dichotomous outcomes .....                 | 15 |
| Figure S15. Mode of delivery and ADHD diagnosis, dichotomous outcomes .....               | 16 |
| Figure S16. Breech delivery and ADHD overall, dichotomous outcomes .....                  | 17 |
| Figure S17. Breech delivery and ADHD diagnosis, dichotomous outcomes .....                | 18 |
| Figure S18. Cesarean delivery and ADHD overall, dichotomous outcomes .....                | 19 |
| Figure S19. Vacuum delivery and ADHD overall, dichotomous outcomes .....                  | 20 |
| Figure S20. Apgar score and ADHD overall, dichotomous outcomes .....                      | 21 |
| Figure S21. Apgar score and ADHD diagnosis, dichotomous outcomes .....                    | 22 |
| Figure S22. Neonatal illness and ADHD overall, dichotomous outcomes .....                 | 23 |
| Figure S23. Neonatal illness and ADHD diagnosis, dichotomous outcomes .....               | 24 |
| Figure S24. Neonatal illness and ADHD overall, continuous outcomes .....                  | 25 |
| Figure S25. No breastfeeding and ADHD overall, dichotomous outcomes .....                 | 26 |

**Figure S1.** Forest plot of meta-analysis of pre-pregnancy weight and attention-deficit/hyperactivity disorder (ADHD) overall\* based on studies reporting dichotomous outcomes

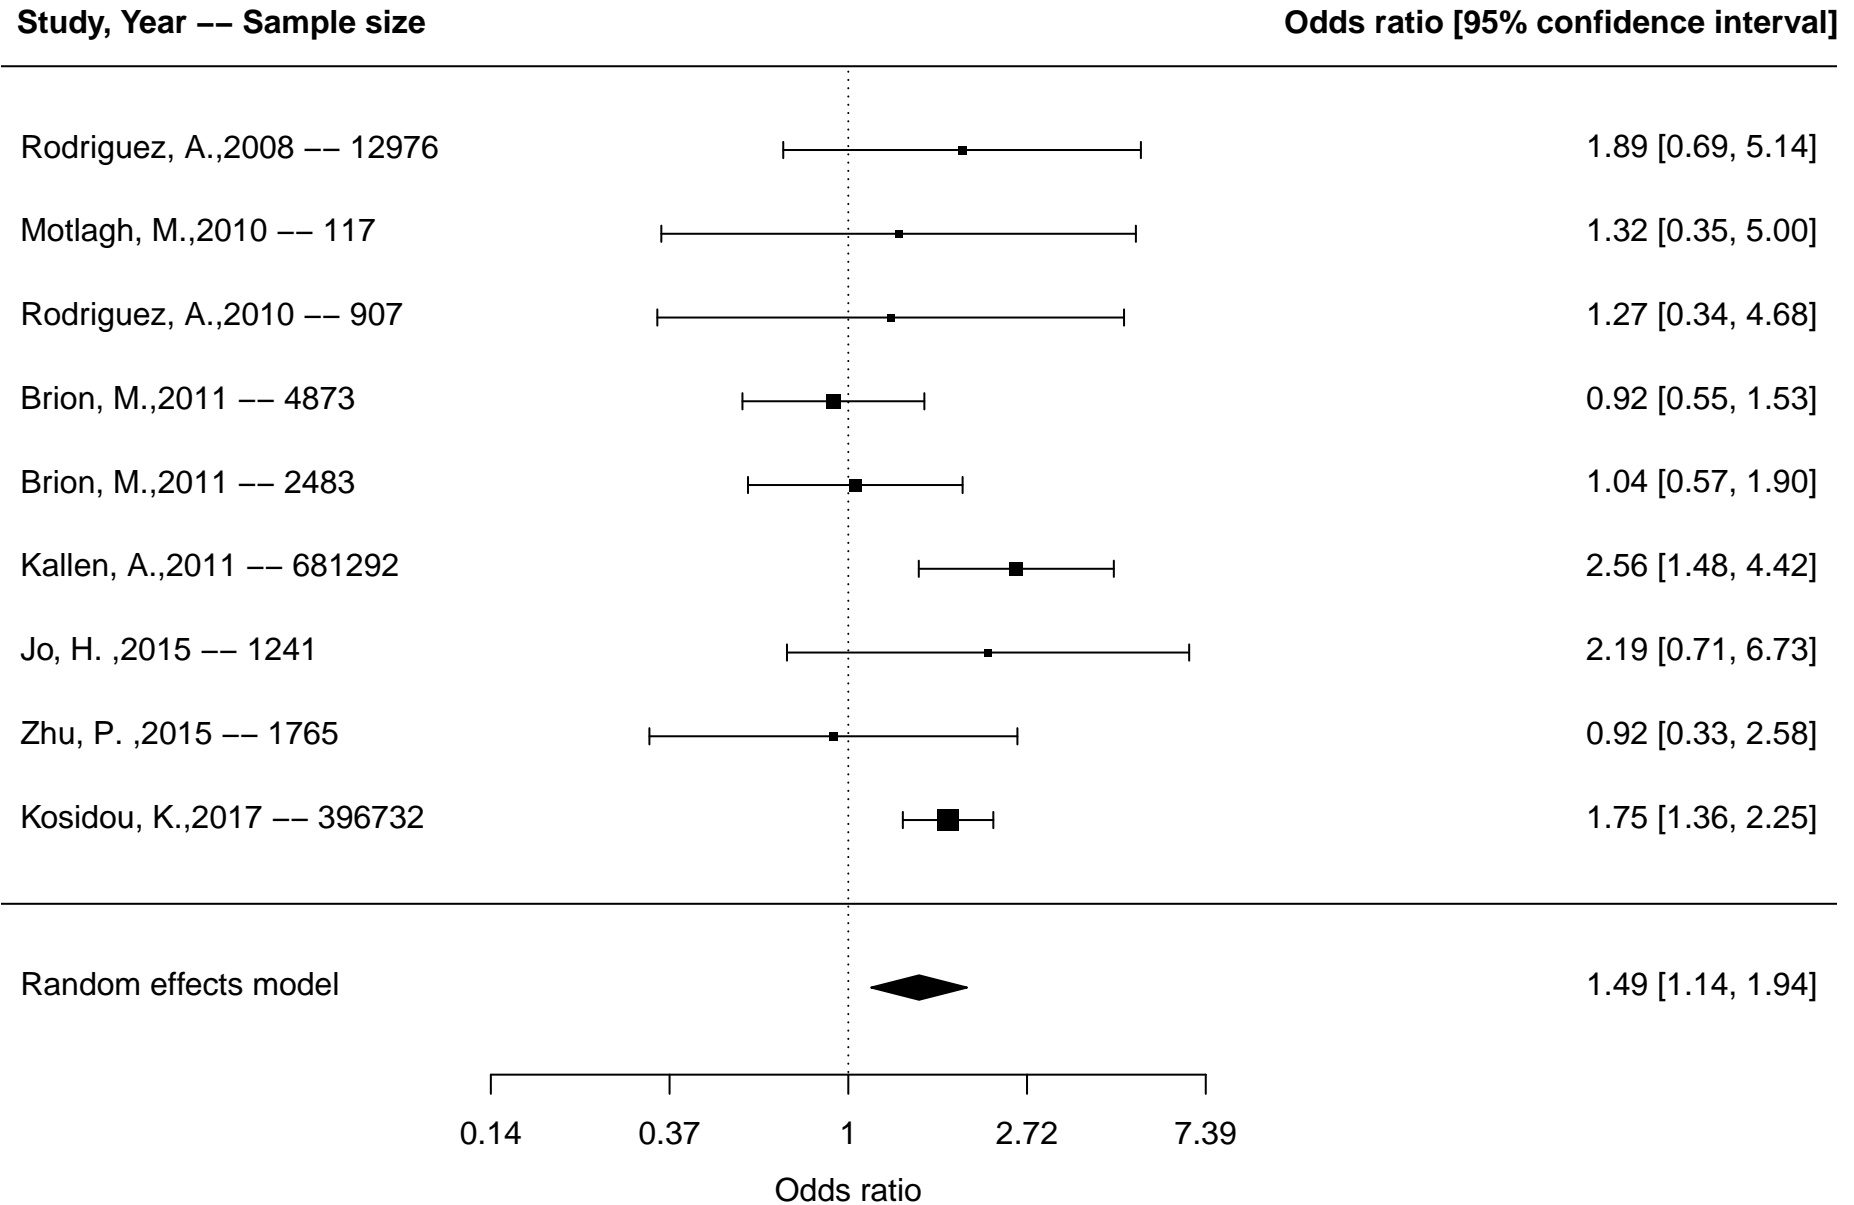

\*Overall includes studies reporting on any included ADHD outcomes (diagnosis, ADHD symptoms, inattention, hyperactivity/impulsivity)

**Figure S2.** Forest plot of meta-analysis of preeclampsia and attention-deficit/hyperactivity disorder (ADHD) overall\* based on studies reporting dichotomous outcomes

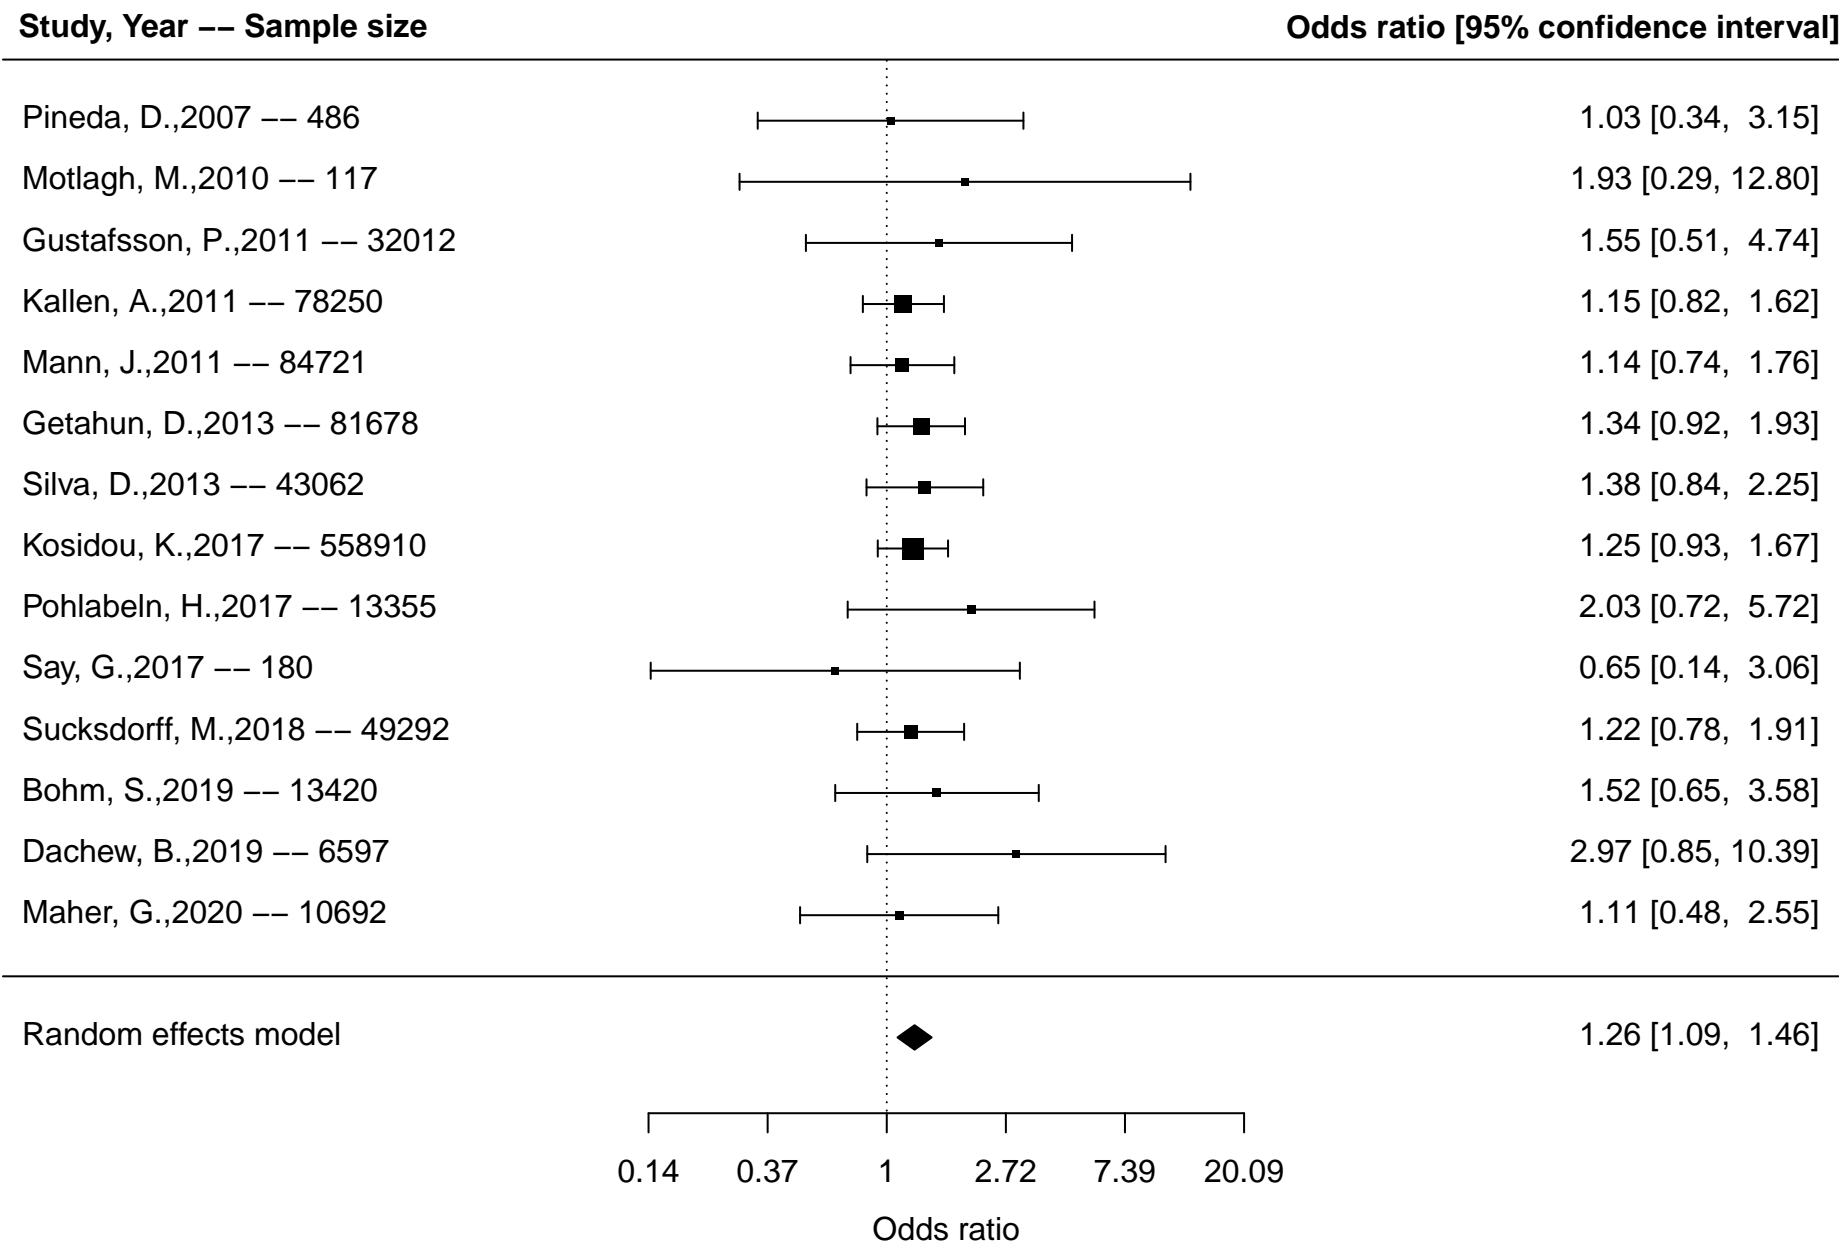

\*Overall includes studies reporting on any included ADHD outcomes (diagnosis, ADHD symptoms, inattention, hyperactivity/impulsivity); the same studies were included (identical results) for ADHD diagnosis

**Figure S3.** Forest plot of meta-analysis of preeclampsia and attention-deficit/hyperactivity disorder (ADHD) diagnosis based on studies reporting dichotomous outcomes

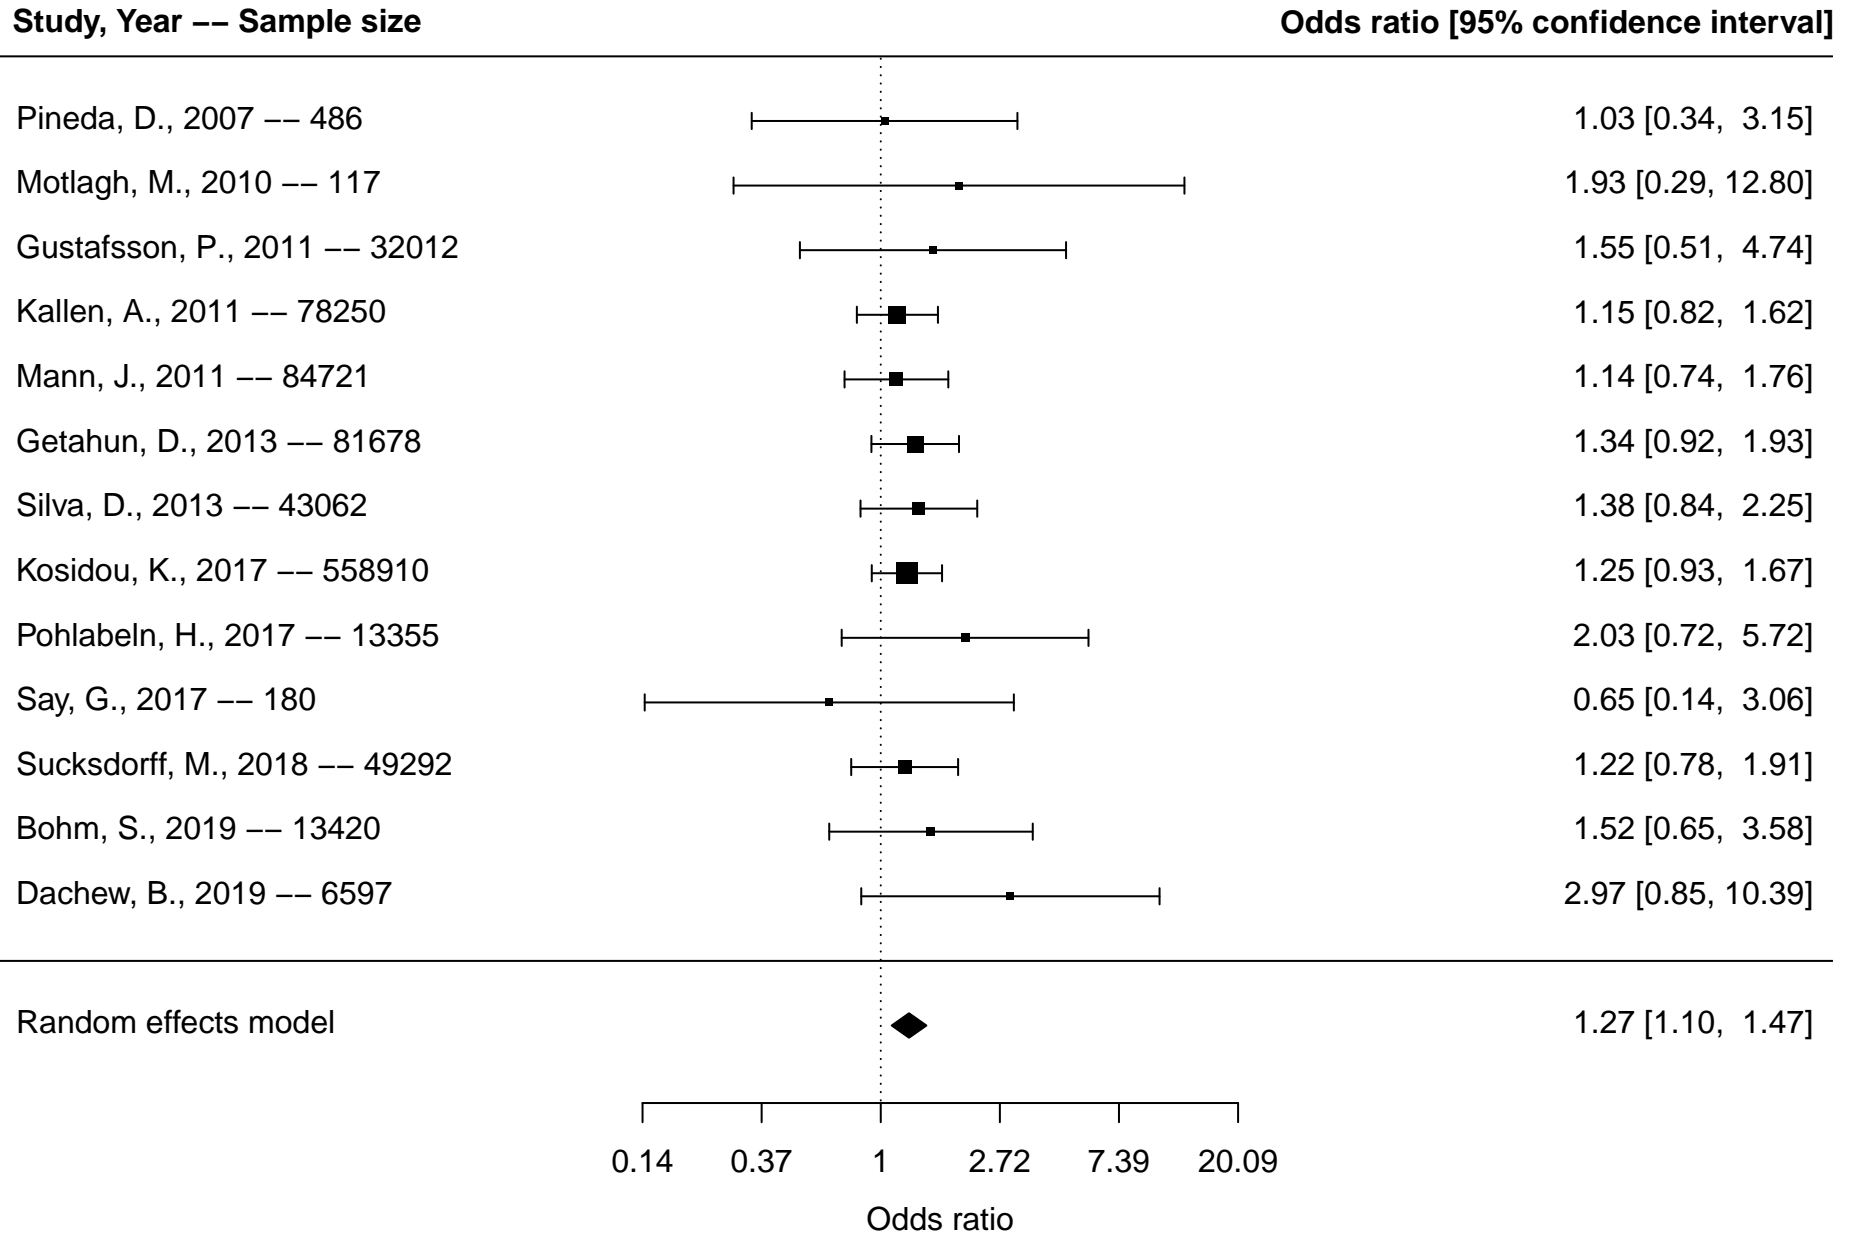

**Figure S4.** Forest plot of meta-analysis of pregnancy complications and attention-deficit/hyperactivity disorder (ADHD) overall\* based on studies reporting dichotomous outcomes

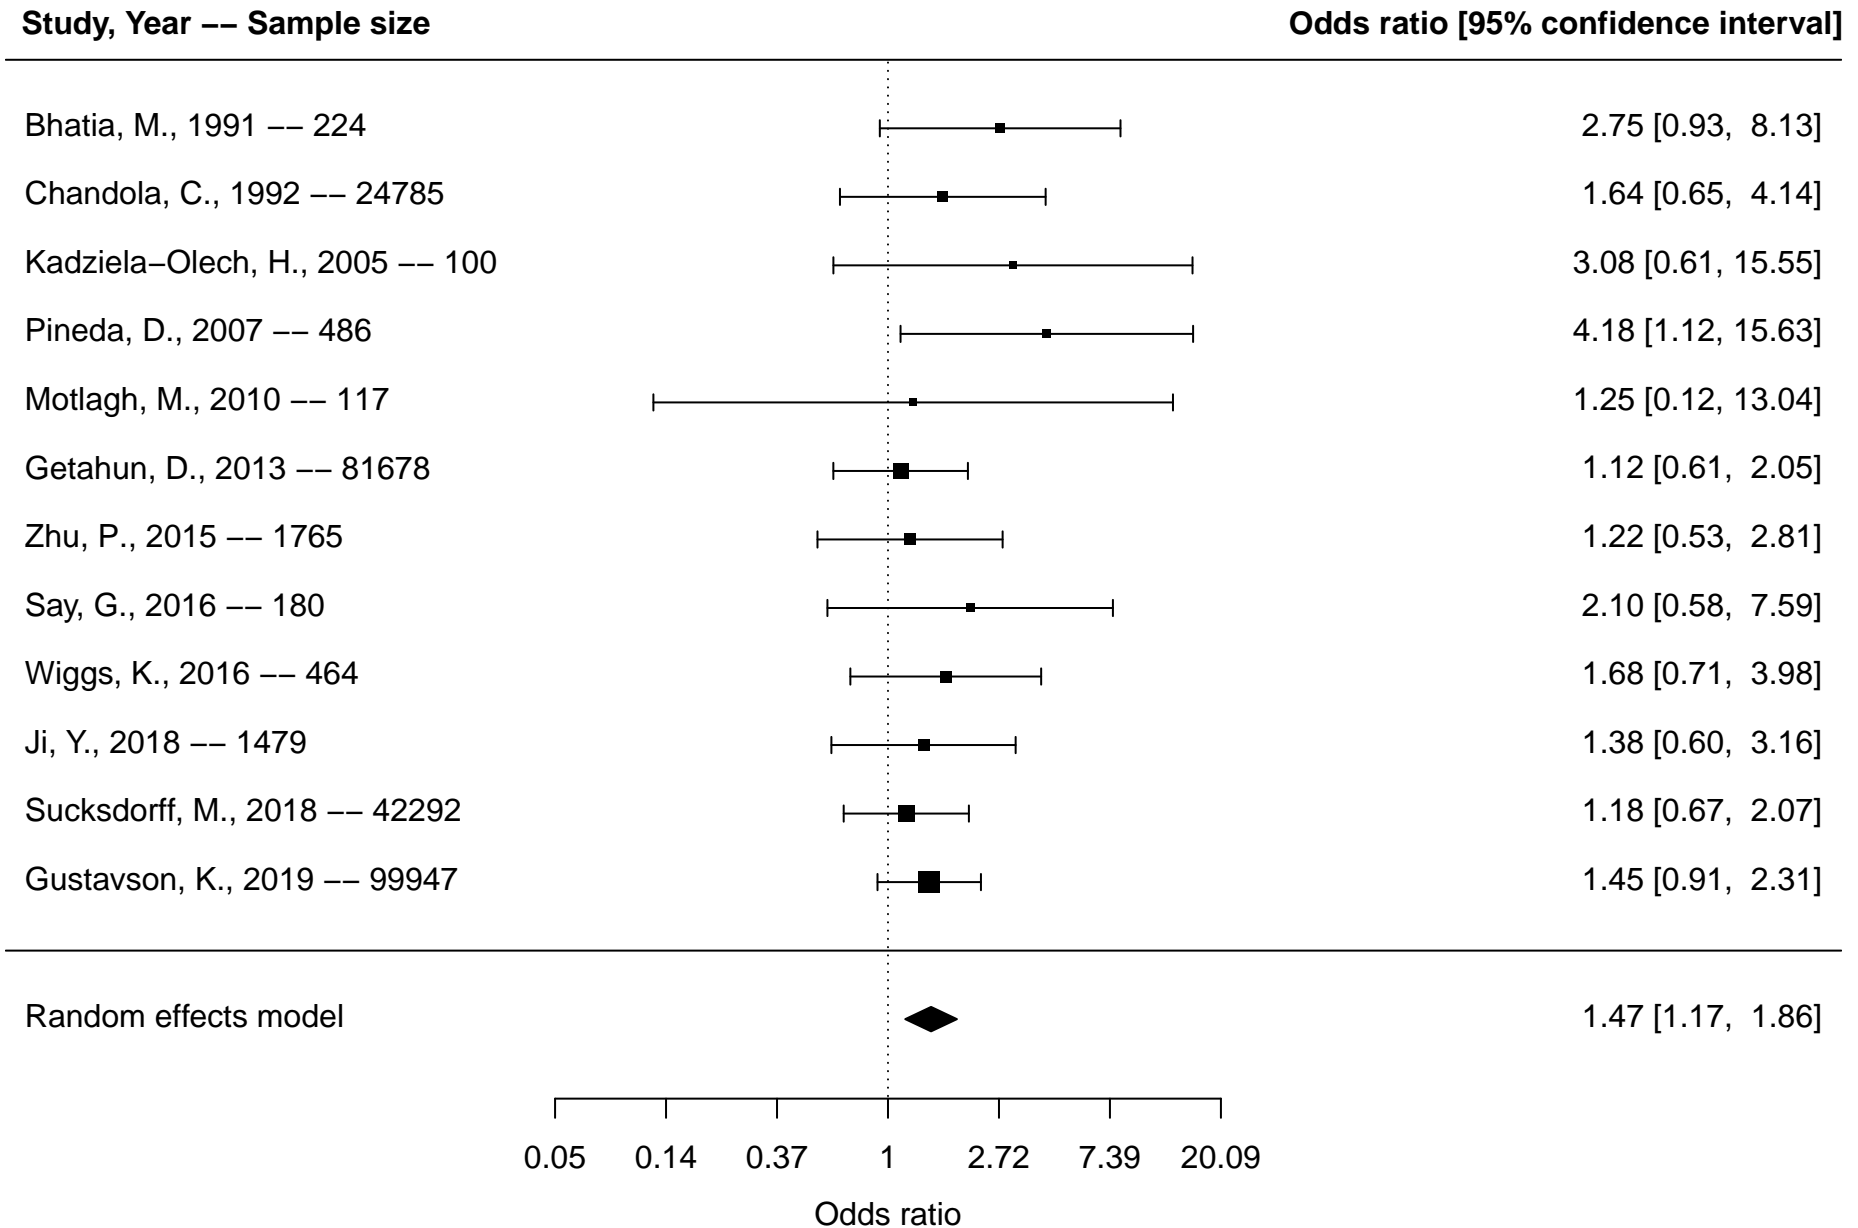

\*Overall includes studies reporting on any included ADHD outcomes (diagnosis, ADHD symptoms, inattention, hyperactivity/impulsivity)

**Figure S5.** Forest plot of meta-analysis of pregnancy complications and attention-deficit/hyperactivity disorder (ADHD) diagnosis based on studies reporting dichotomous outcomes

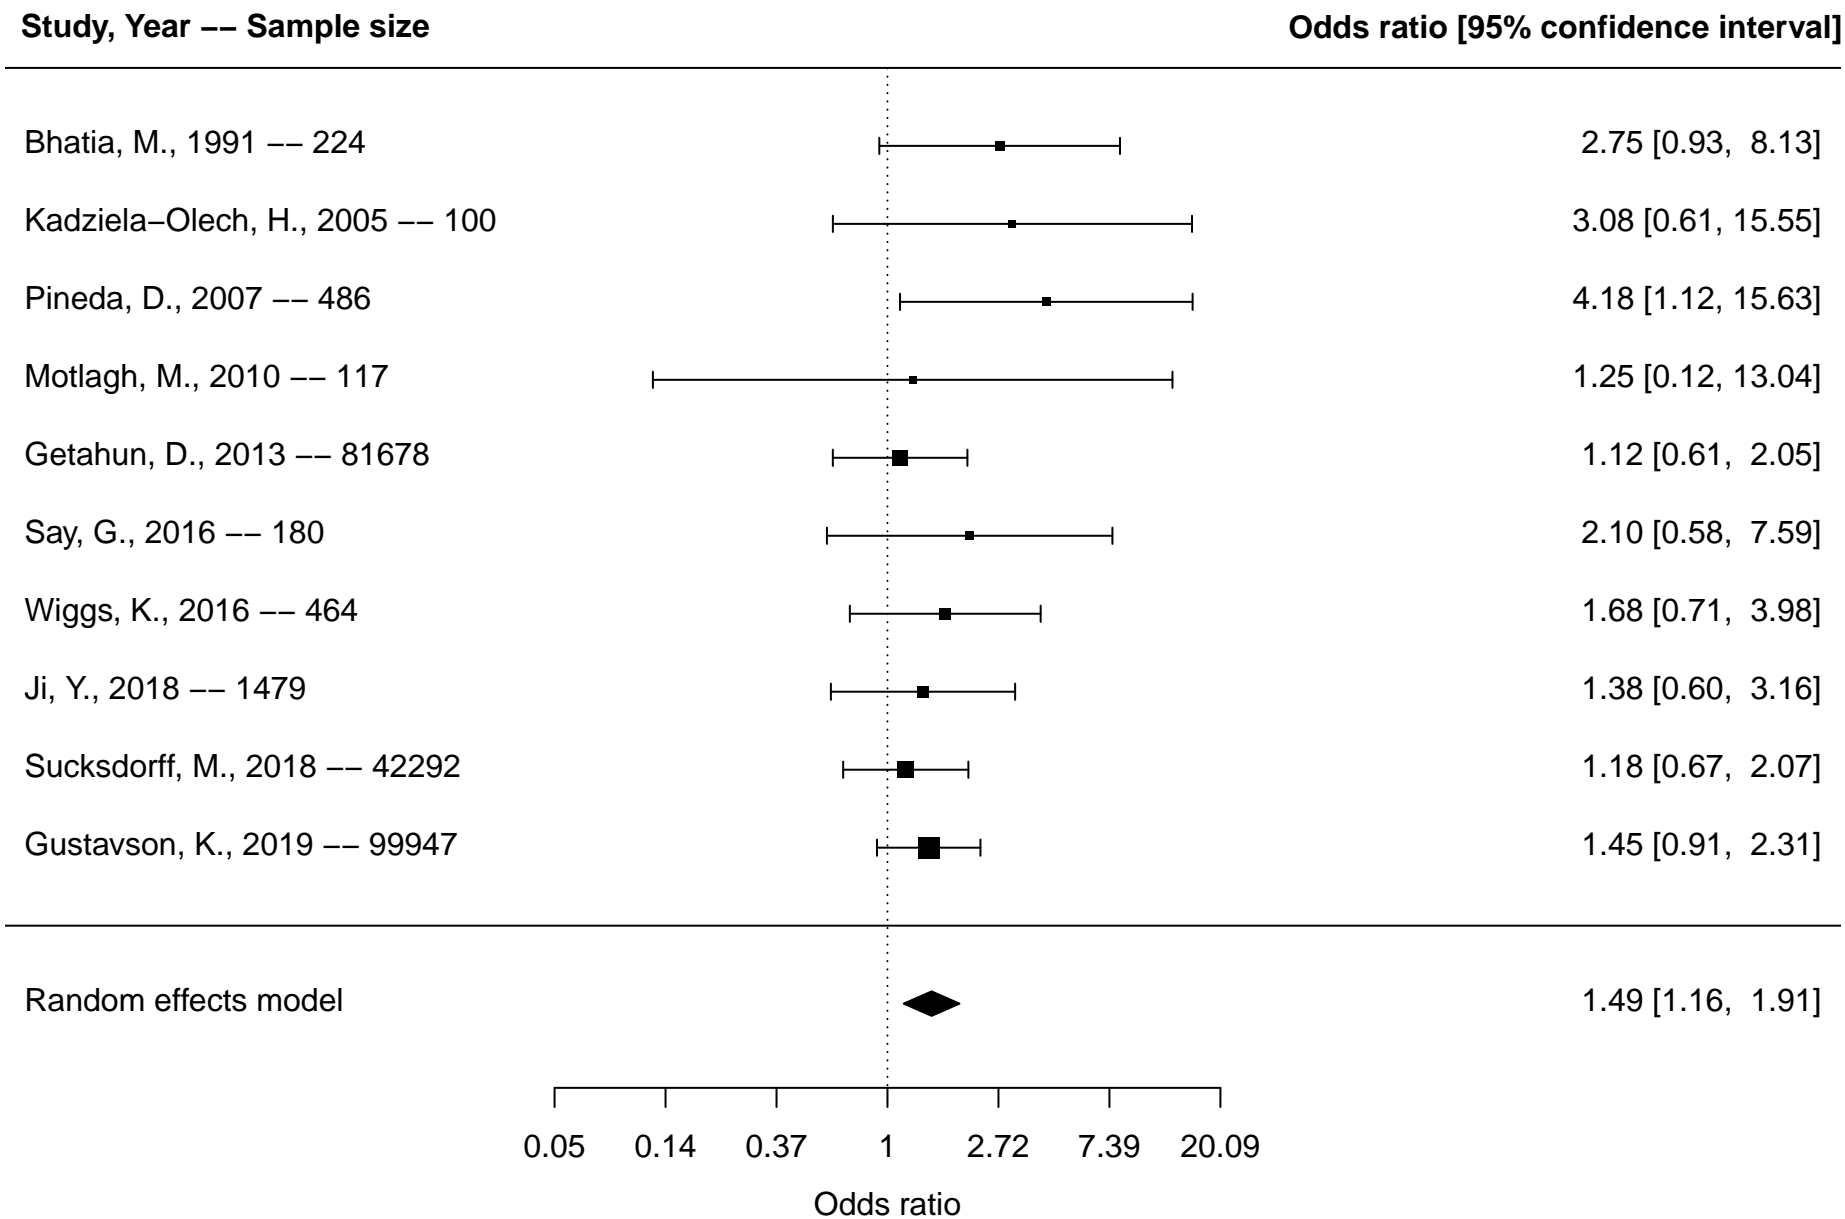

**Figure S6.** Forest plot of meta-analysis of prenatal testosterone\* and attention-deficit/hyperactivity disorder (ADHD) overall\*\* based on studies reporting continuous outcomes

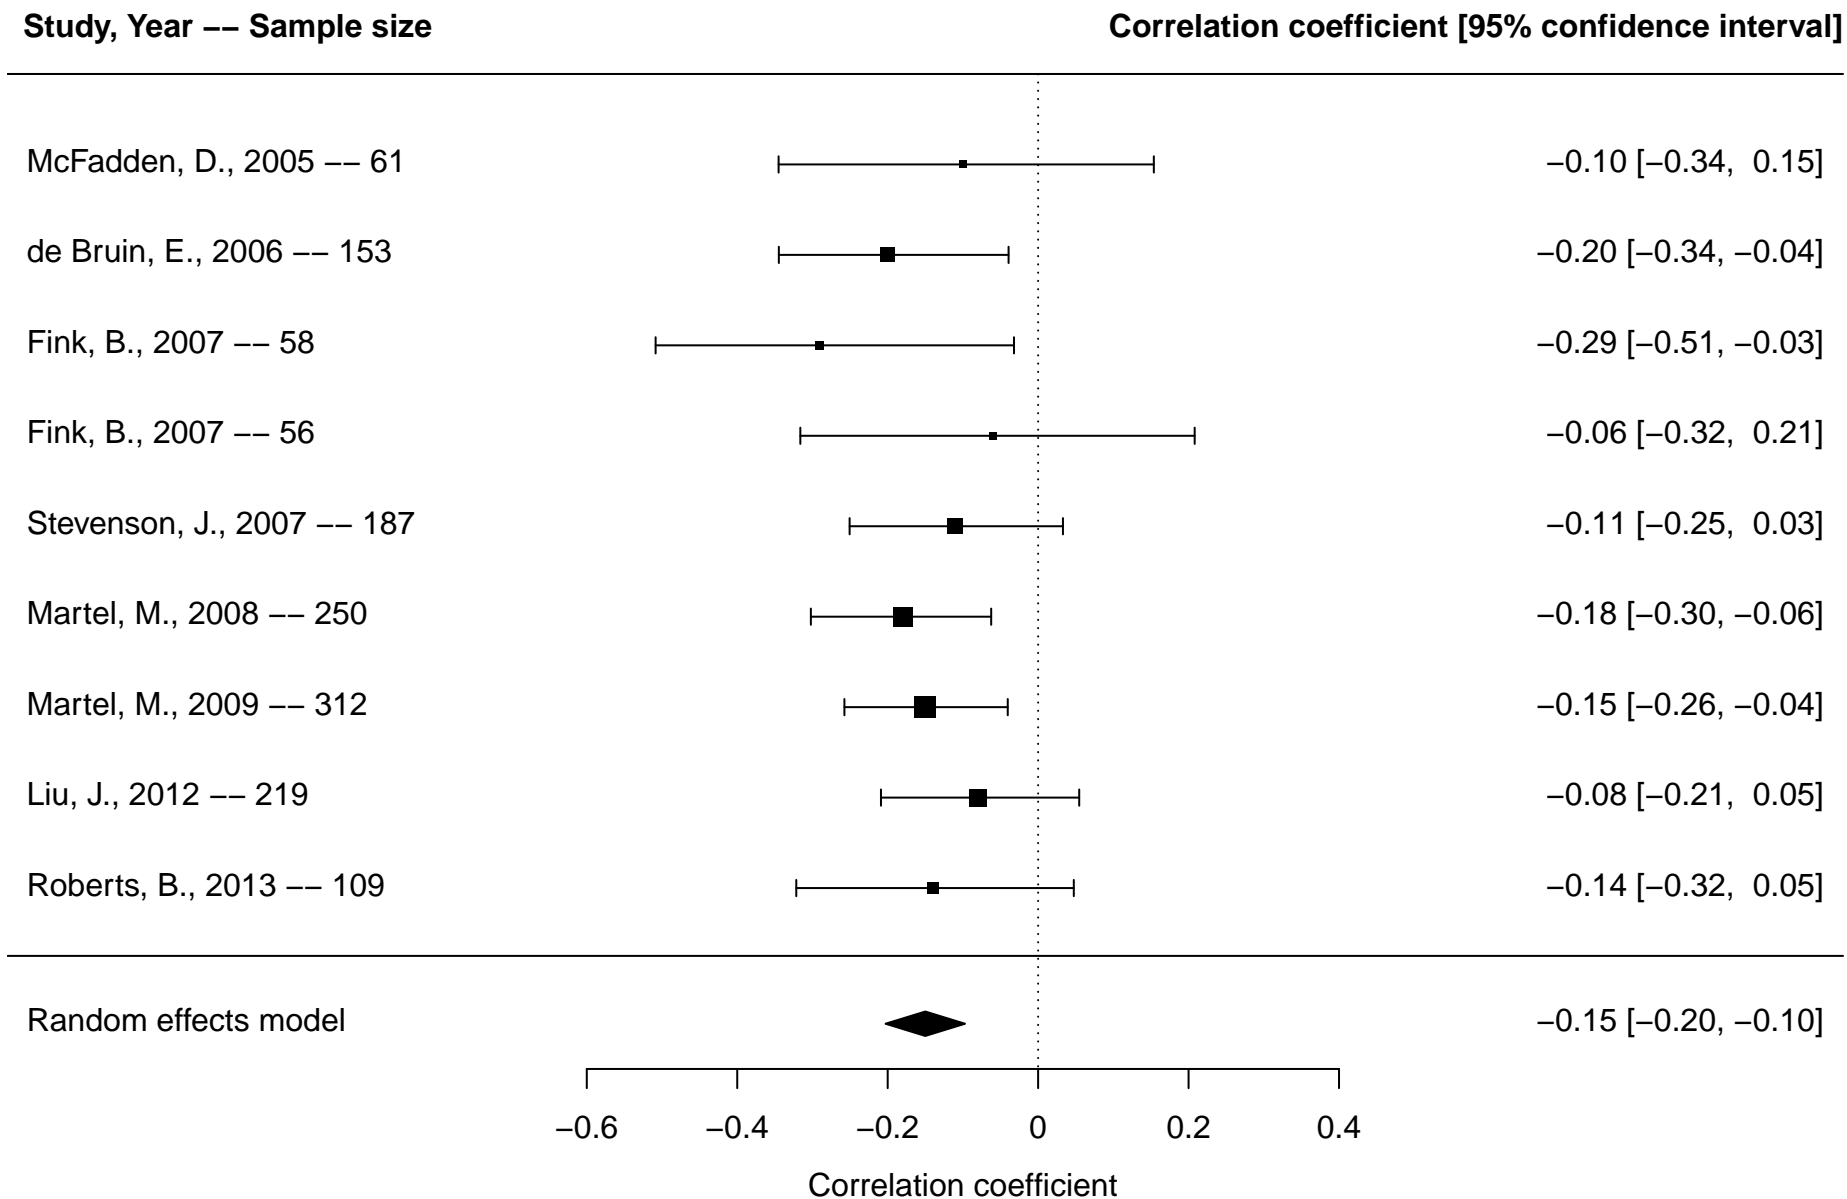

\*Prenatal testosterone was measured using finger length ratio (2nd digit (2D):4D ratio). A lower ratio represents greater testosterone exposure

\*\*Overall includes studies reporting on any included ADHD outcomes (diagnosis, ADHD symptoms, inattention, hyperactivity/impulsivity)

**Figure S7.** Forest plot of meta-analysis of prenatal testosterone\* and attention-deficit/hyperactivity disorder (ADHD) diagnosis based on studies reporting continuous outcomes

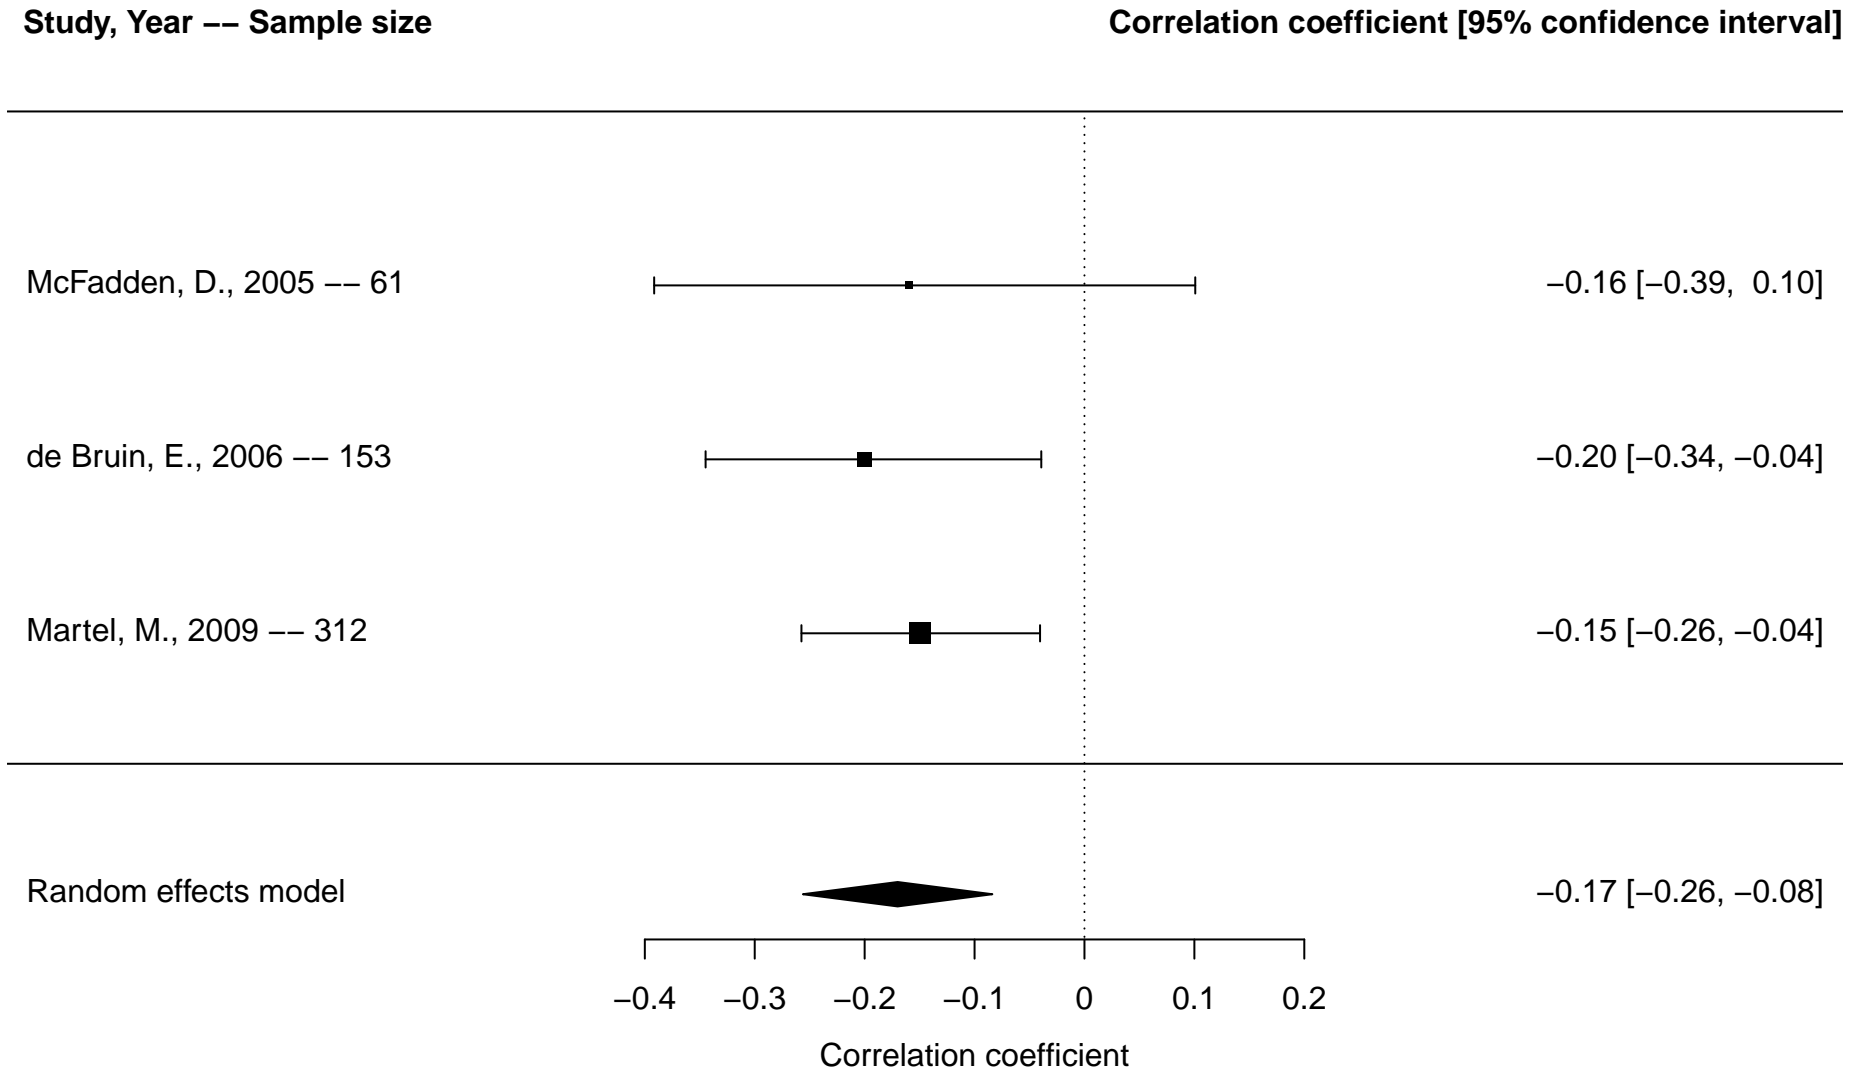

\*Prenatal testosterone was measured using finger length ratio (2nd digit (2D):4D ratio). A lower ratio represents greater testosterone exposure



**Figure S8.** Forest plot of meta-analysis of prenatal testosterone\* and inattention based on studies reporting continuous outcomes

**Study, Year -- Sample size**

**Correlation coefficient [95% confidence interval]**

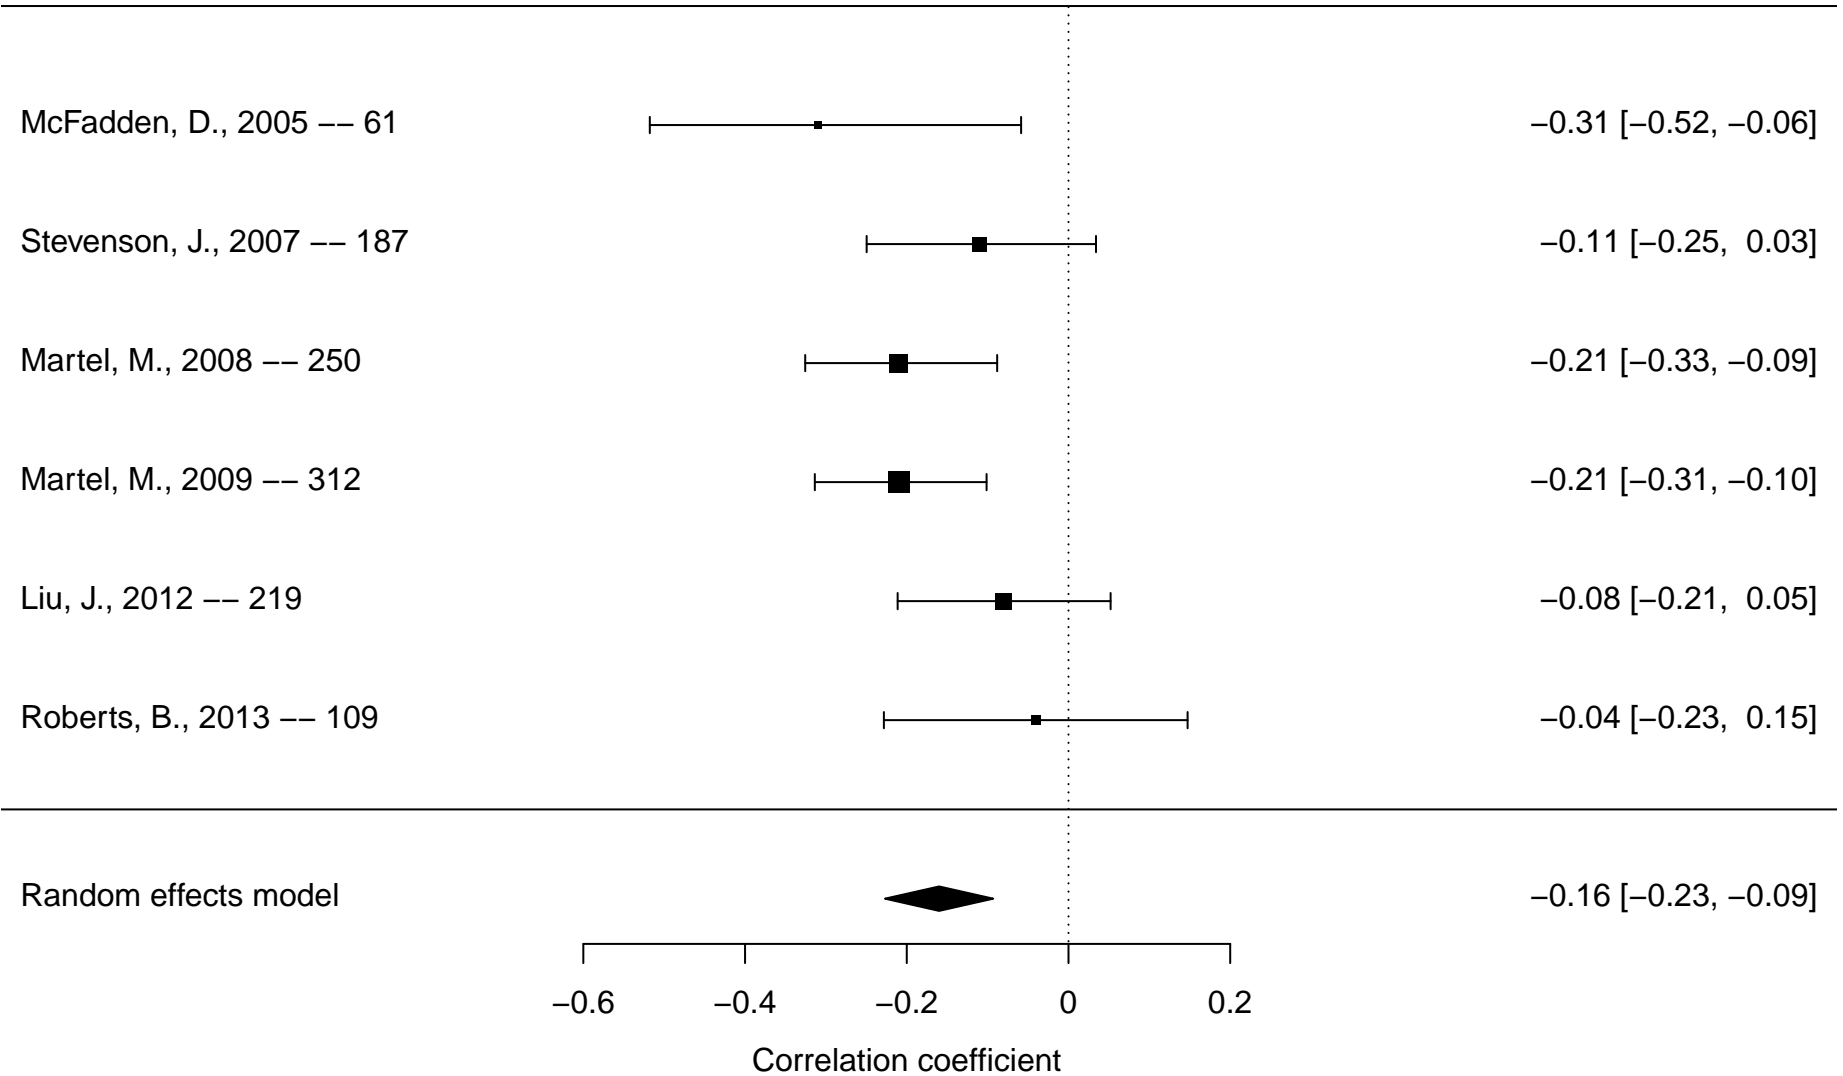

\*Prenatal testosterone was measured using finger length ratio (2nd digit (2D):4D ratio). A lower ratio represents greater testosterone exposure

**Figure S9.** Forest plot of meta-analysis of prenatal testosterone\* and hyperactivity/impulsivity based on studies reporting continuous outcomes

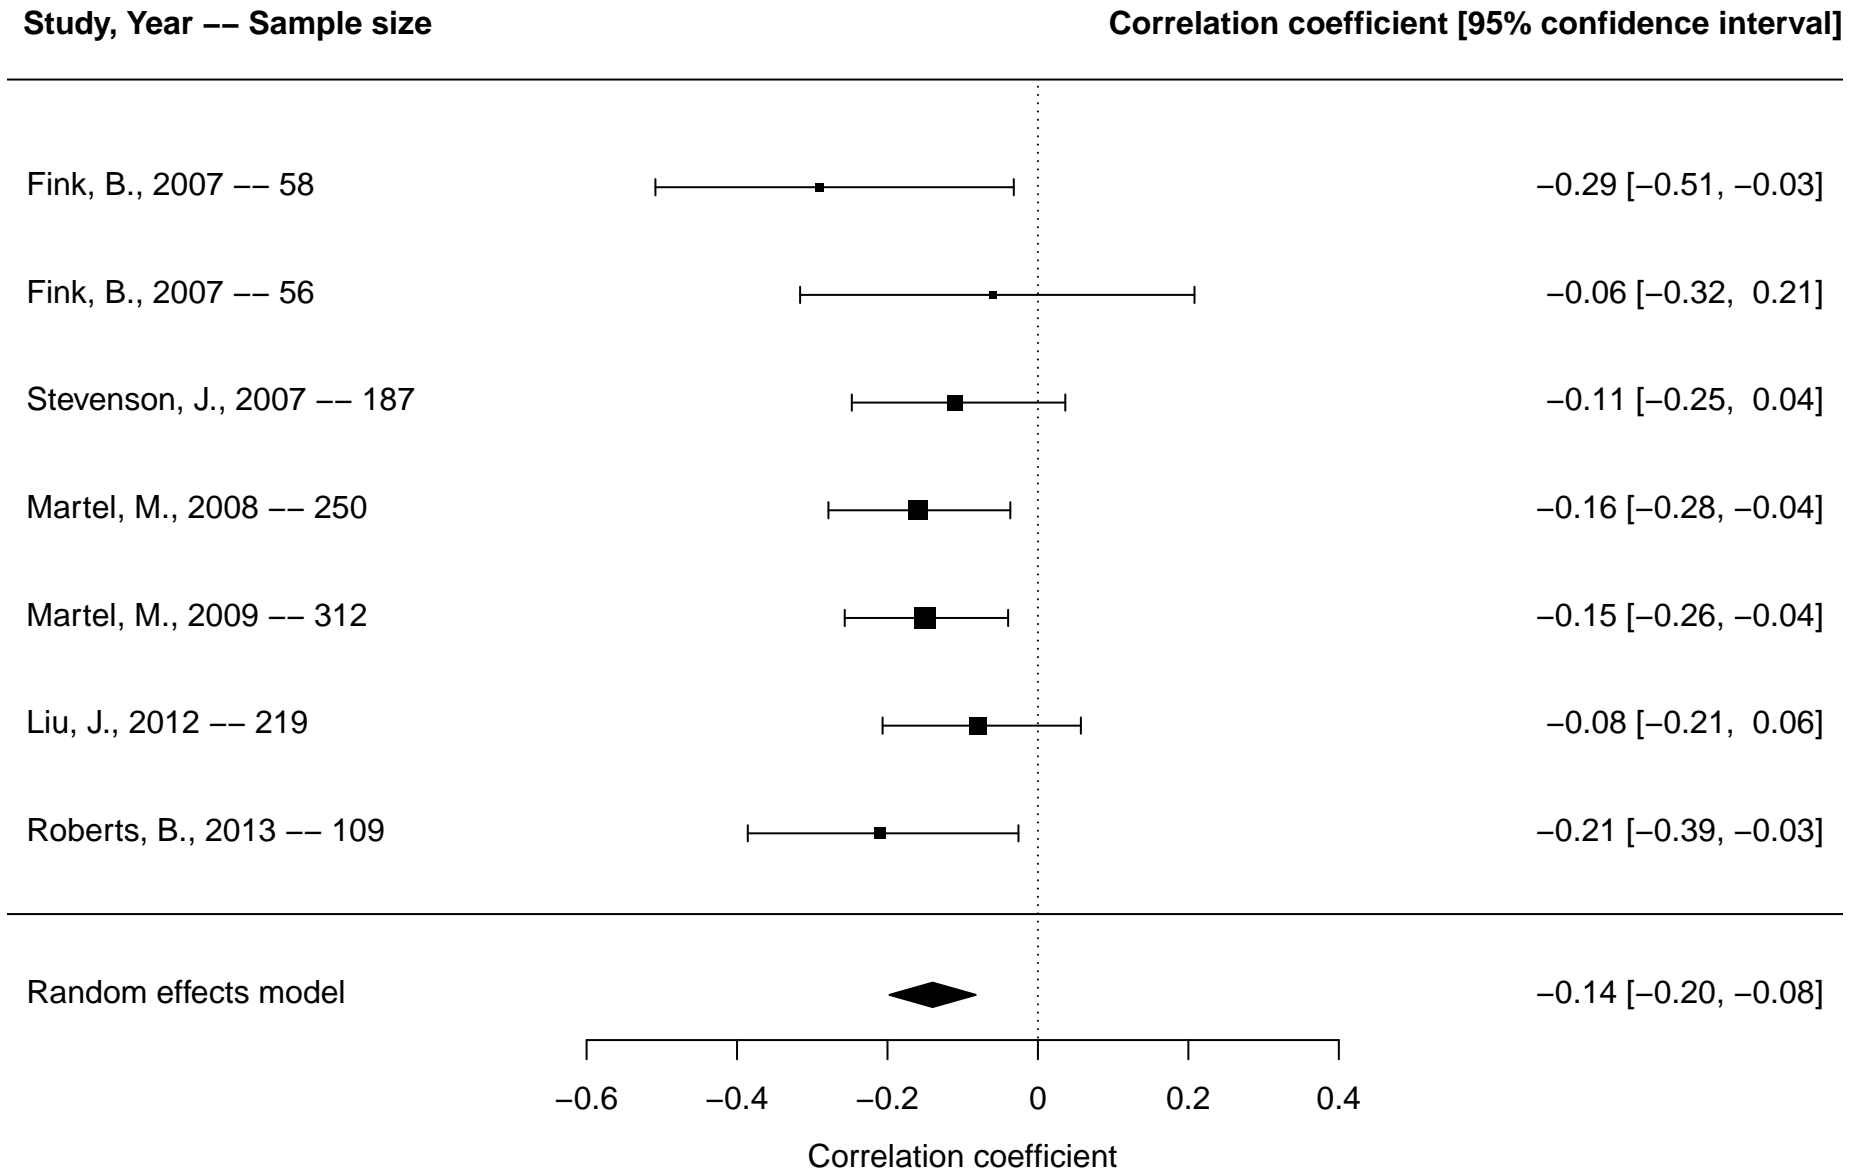

\*Prenatal testosterone was measured using finger length ratio (2nd digit (2D):4D ratio). A lower ratio represents greater testosterone exposure

**Figure S10.** Forest plot of meta-analysis of perinatal asphyxia and attention-deficit/hyperactivity disorder (ADHD) overall\* based on studies reporting dichotomous outcomes

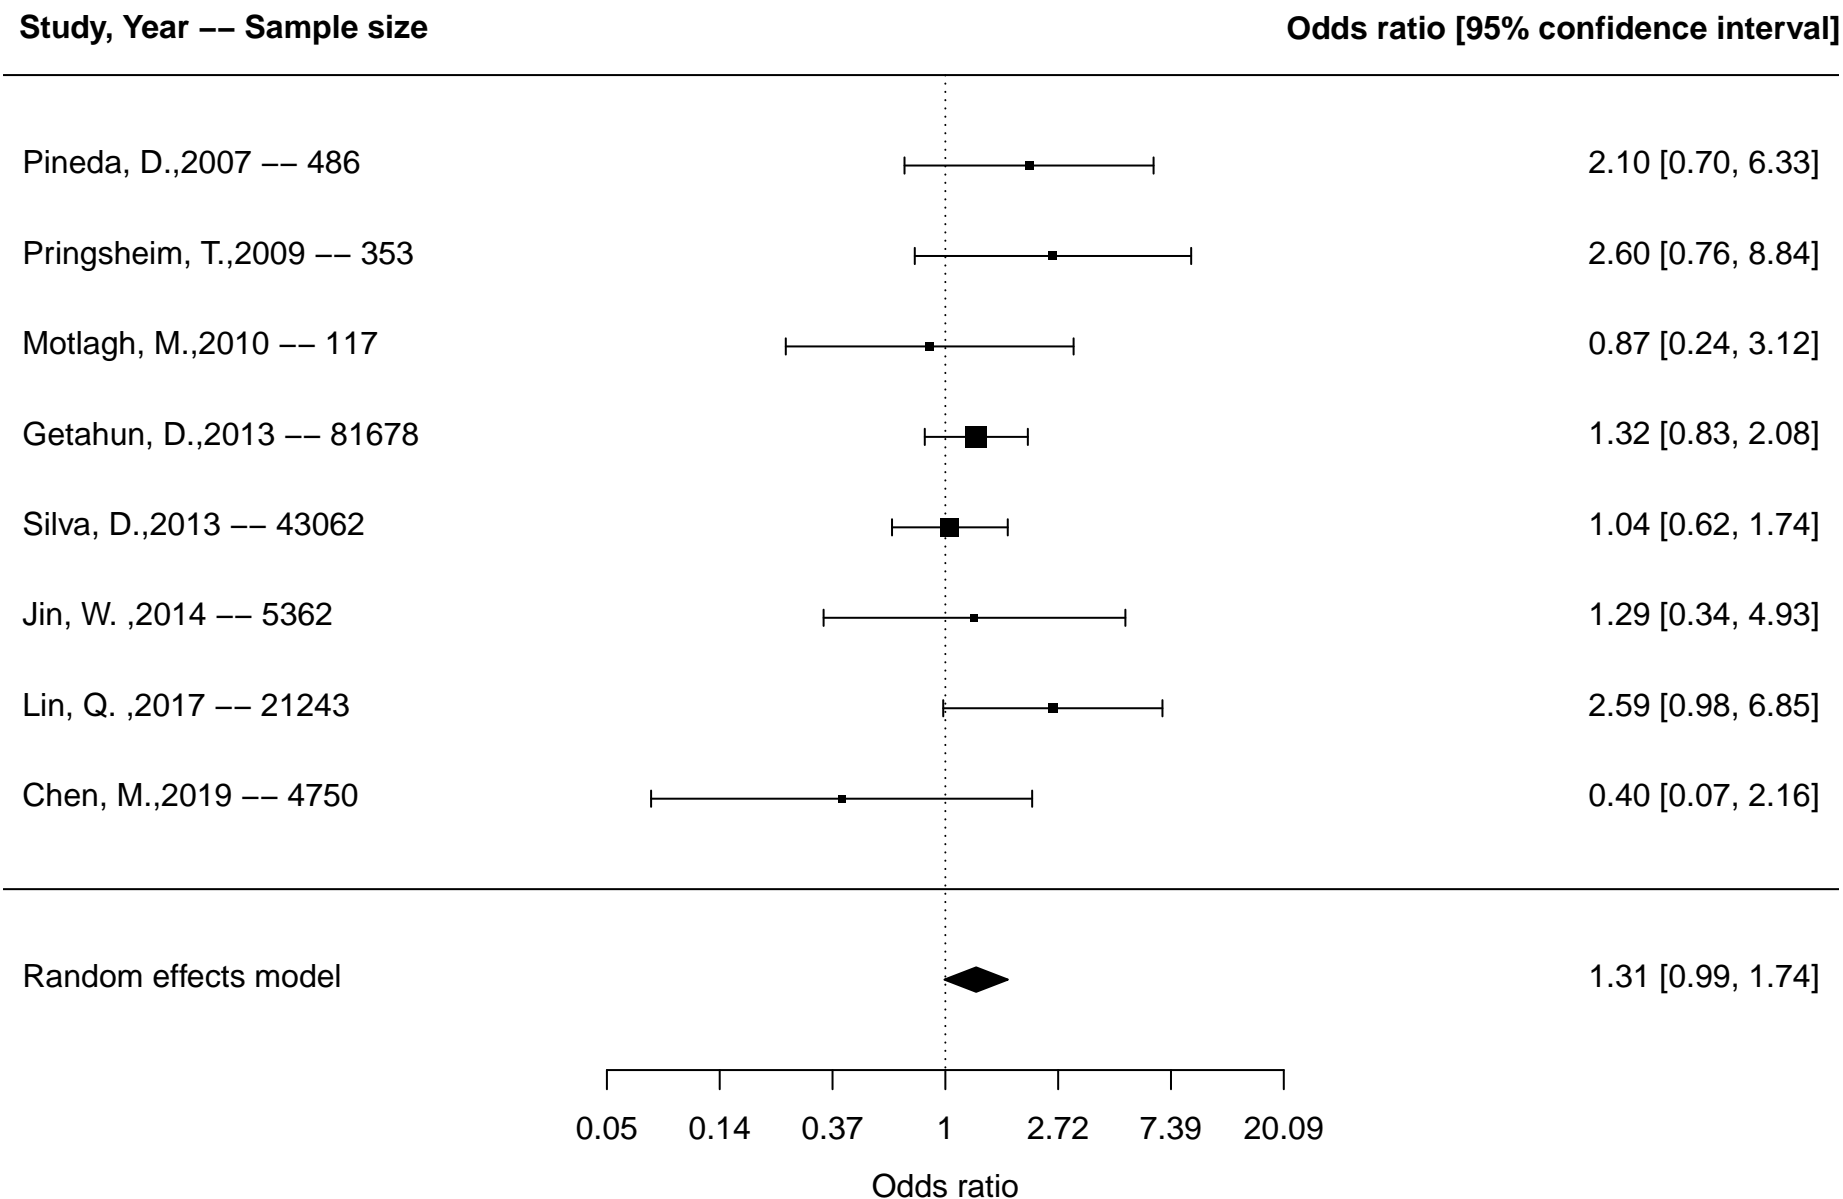

\*Overall includes studies reporting on any included ADHD outcomes (diagnosis, ADHD symptoms, inattention, hyperactivity/impulsivity)

**Figure S11.** Forest plot of meta-analysis of perinatal asphyxia and attention-deficit/hyperactivity disorder (ADHD) diagnosis based on studies reporting dichotomous outcomes

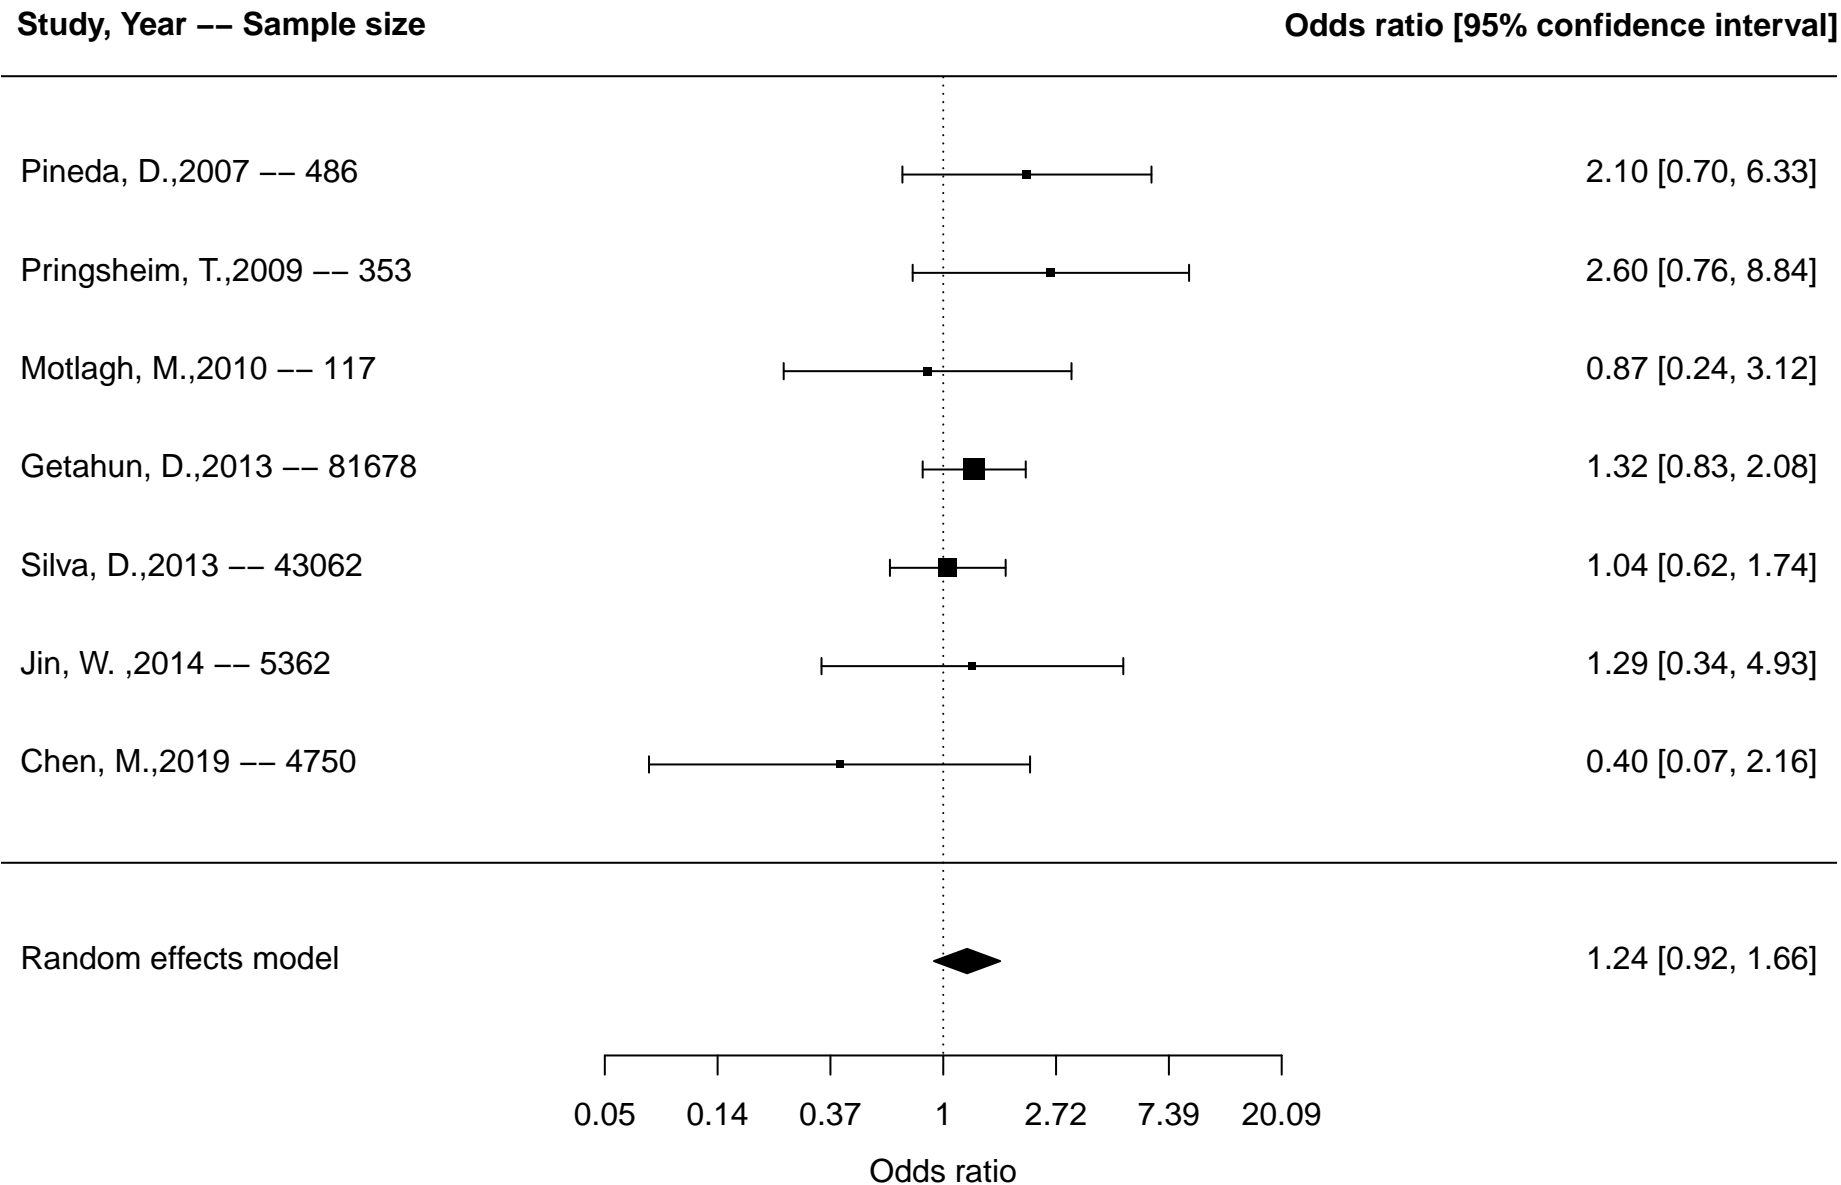

**Figure S12.** Forest plot of meta-analysis of labor complications and attention-deficit/hyperactivity disorder (ADHD) overall\* based on studies reporting dichotomous outcomes

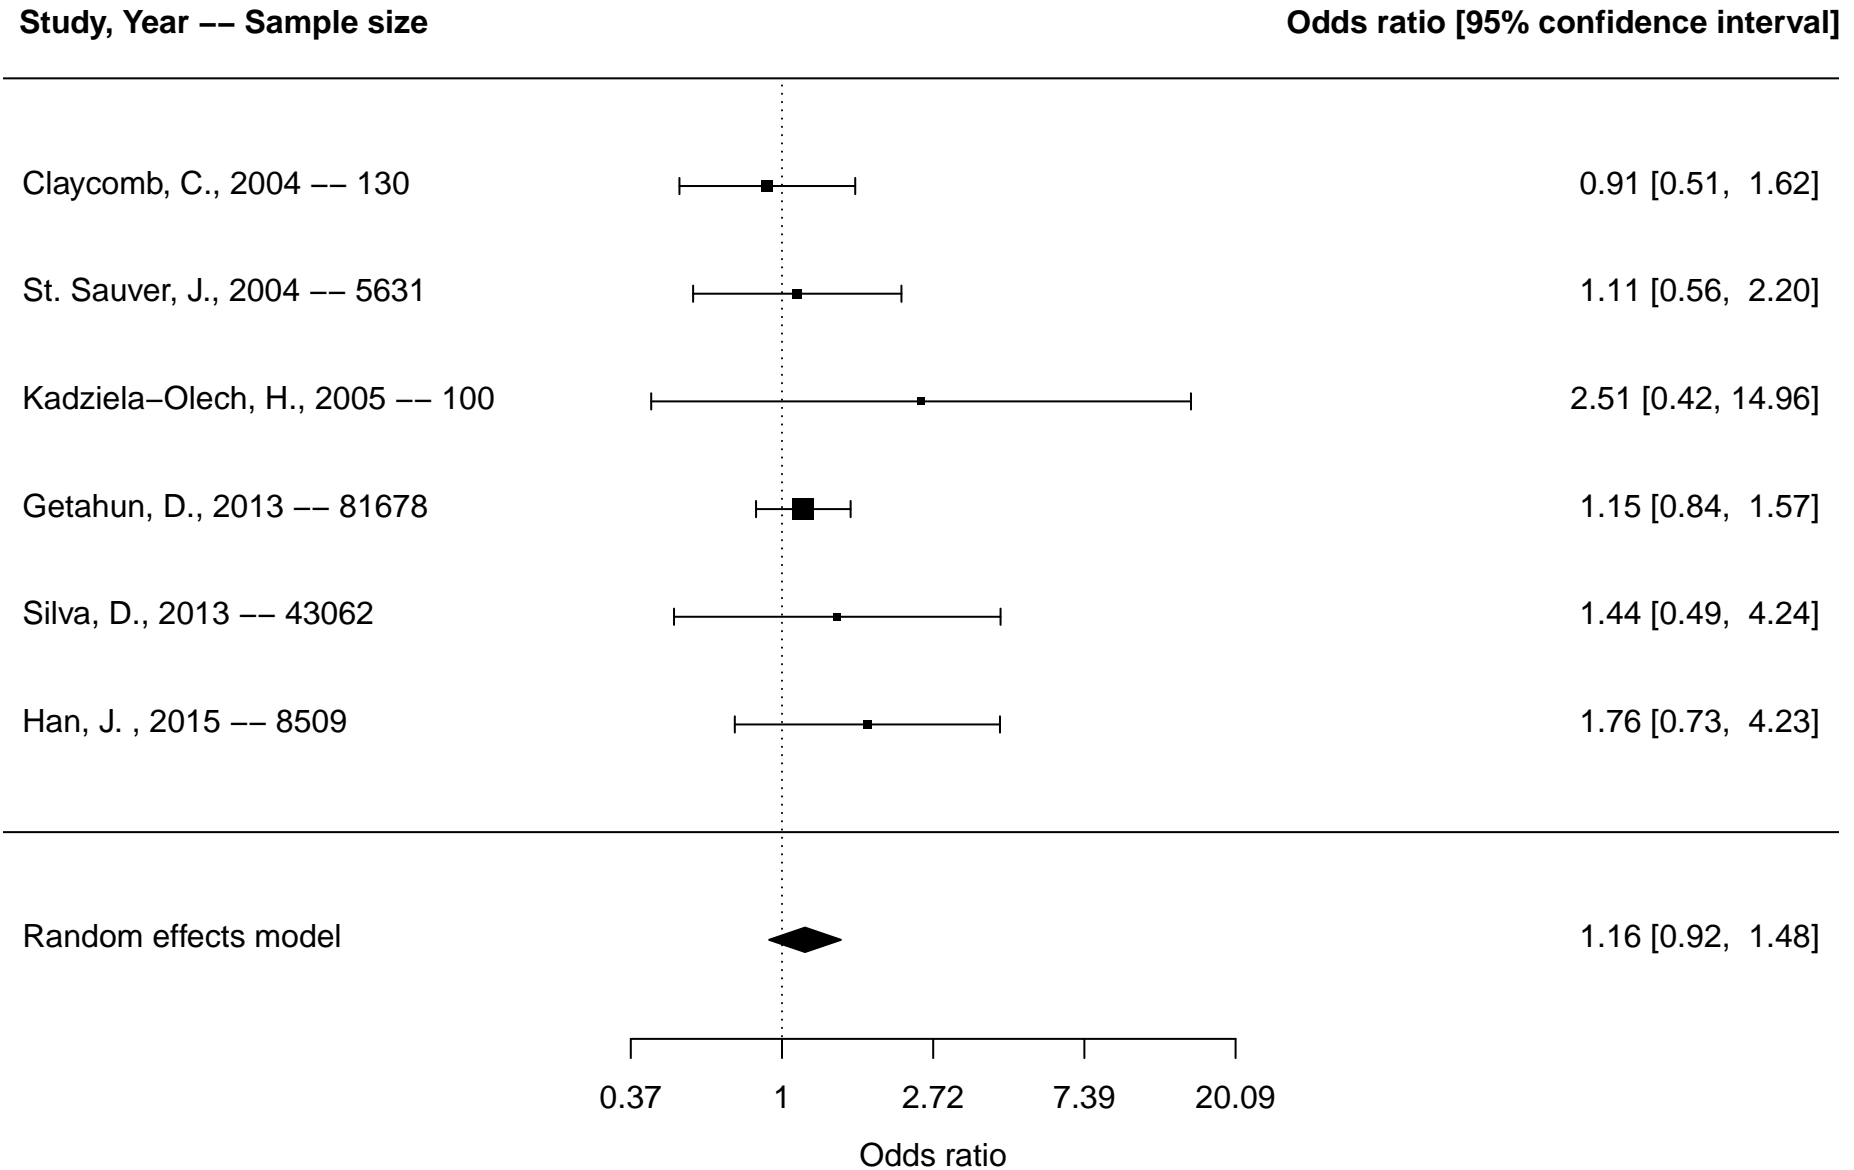

\*Overall includes studies reporting on any included ADHD outcomes (diagnosis, ADHD symptoms, inattention, hyperactivity/impulsivity); the same studies were included (identical results) for ADHD diagnosis

**Figure S13.** Forest plot of meta-analysis of labor complications and attention-deficit/hyperactivity disorder (ADHD) overall\* based on studies reporting continuous outcomes

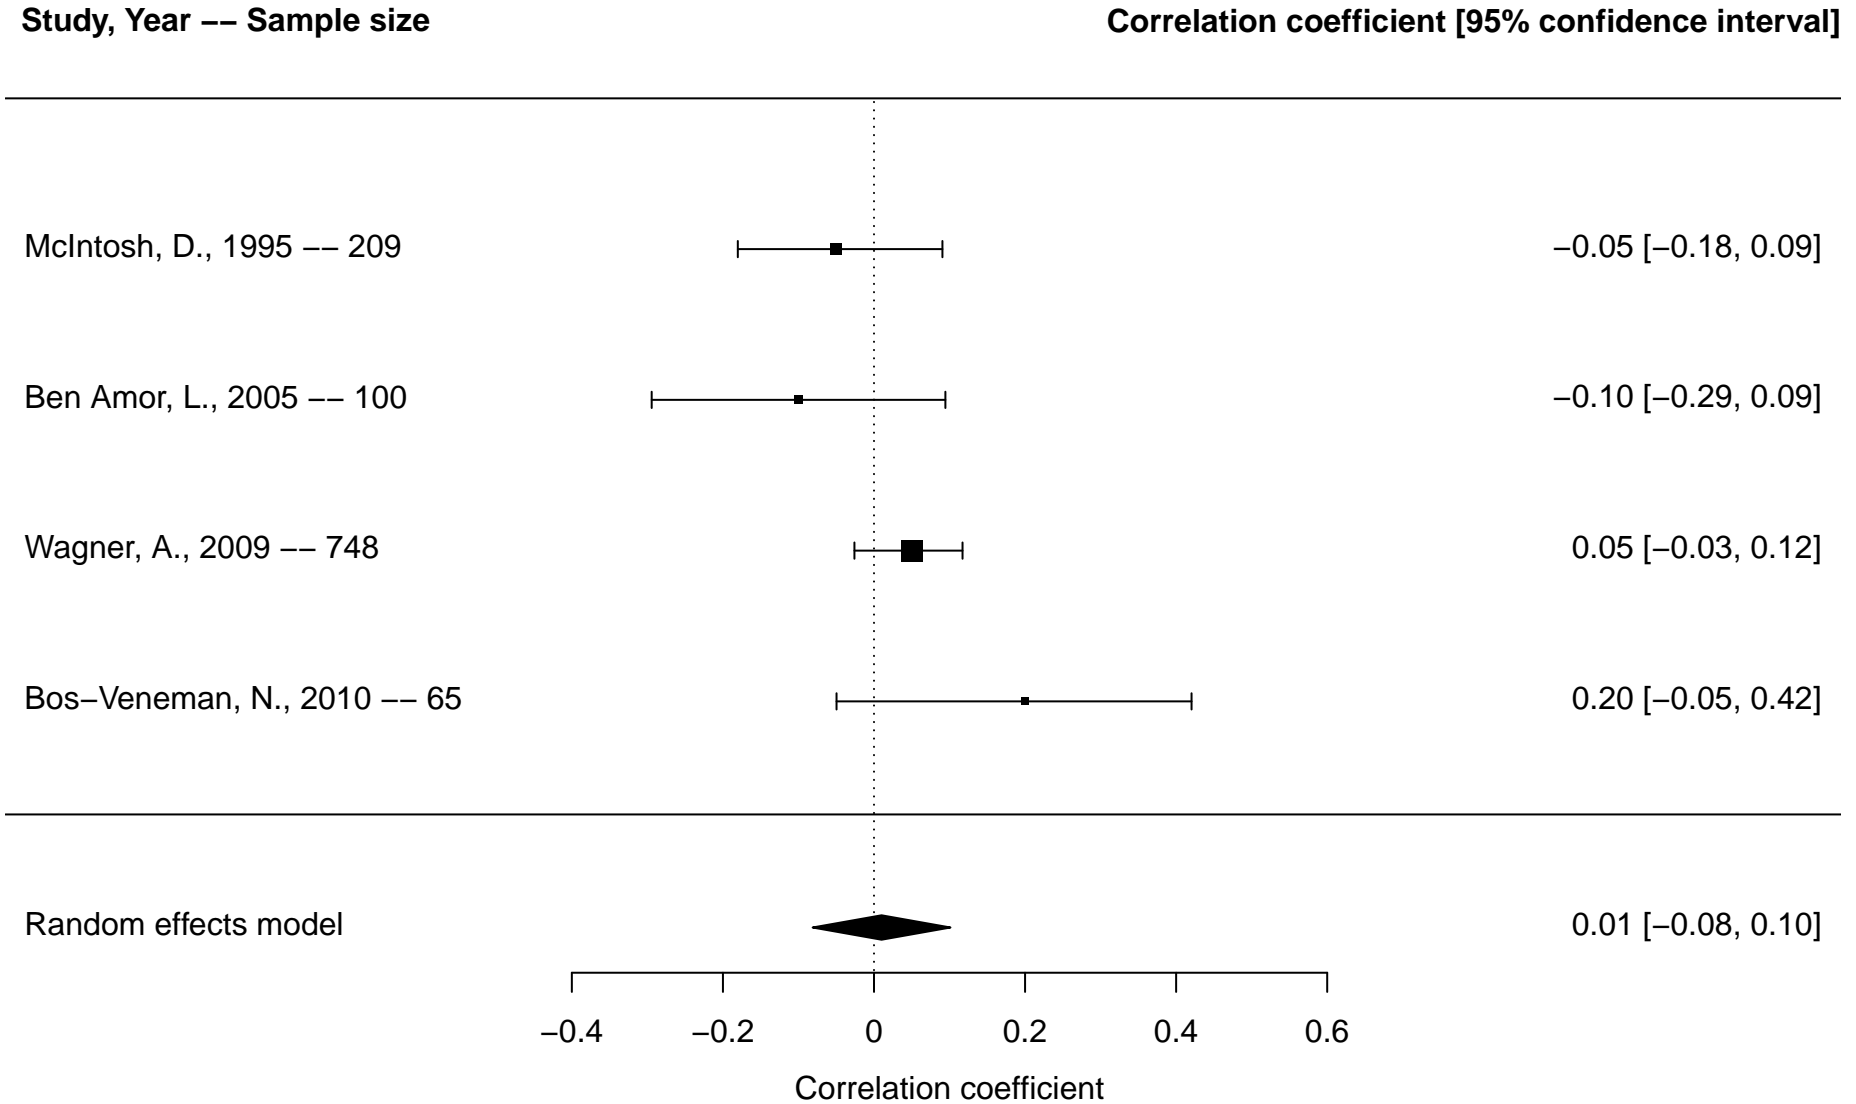

\*Overall includes studies reporting on any included ADHD outcomes (diagnosis, ADHD symptoms, inattention, hyperactivity/impulsivity)

**Figure S14.** Forest plot of meta-analysis of mode of delivery and attention-deficit/hyperactivity disorder (ADHD) overall\* based on studies reporting dichotomous outcomes

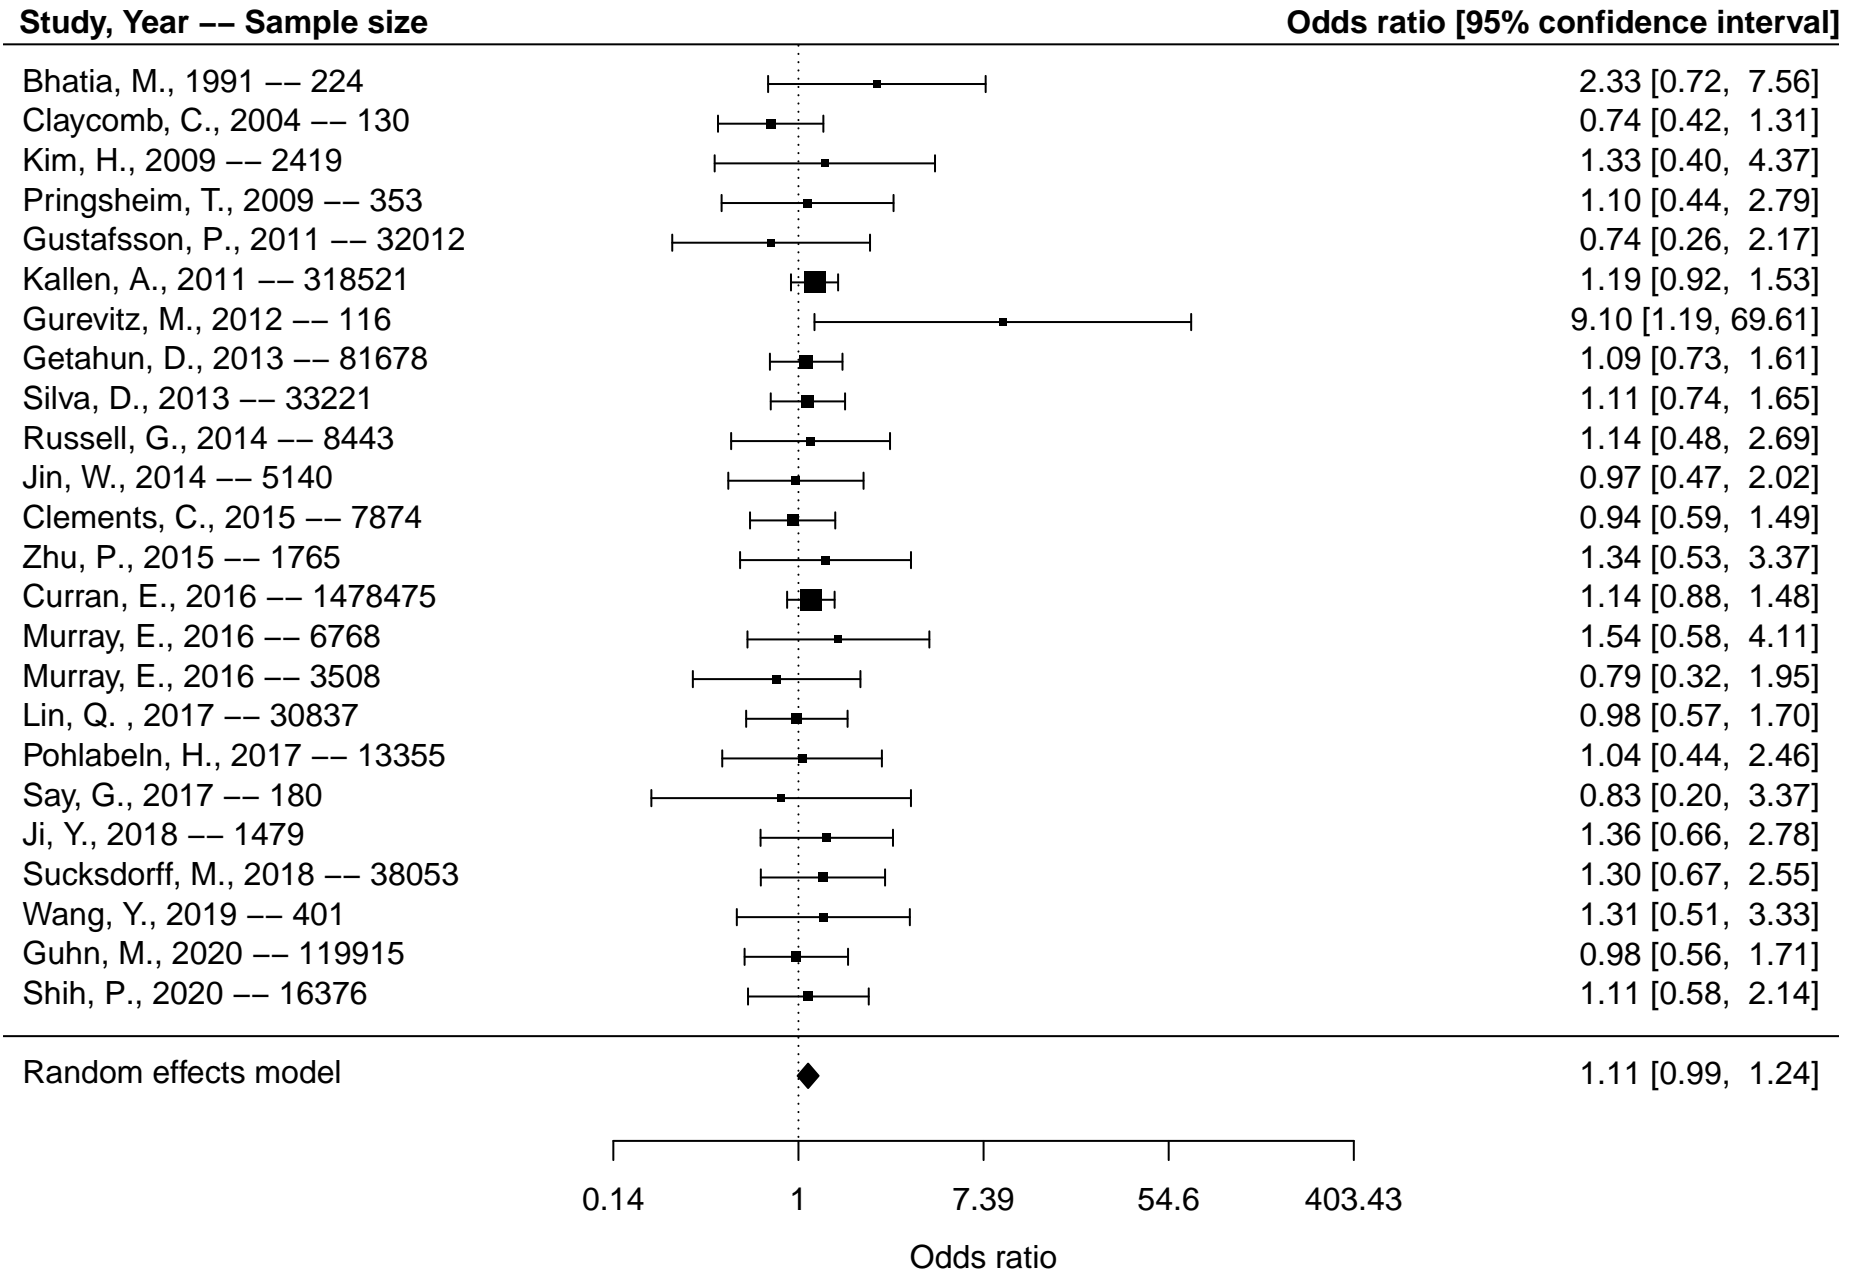

\*Overall includes studies reporting on any included ADHD outcomes (diagnosis, ADHD symptoms, inattention, hyperactivity/impulsivity)

**Figure S15.** Forest plot of meta-analysis of mode of delivery and attention-deficit/hyperactivity disorder (ADHD) diagnosis based on studies reporting dichotomous outcomes

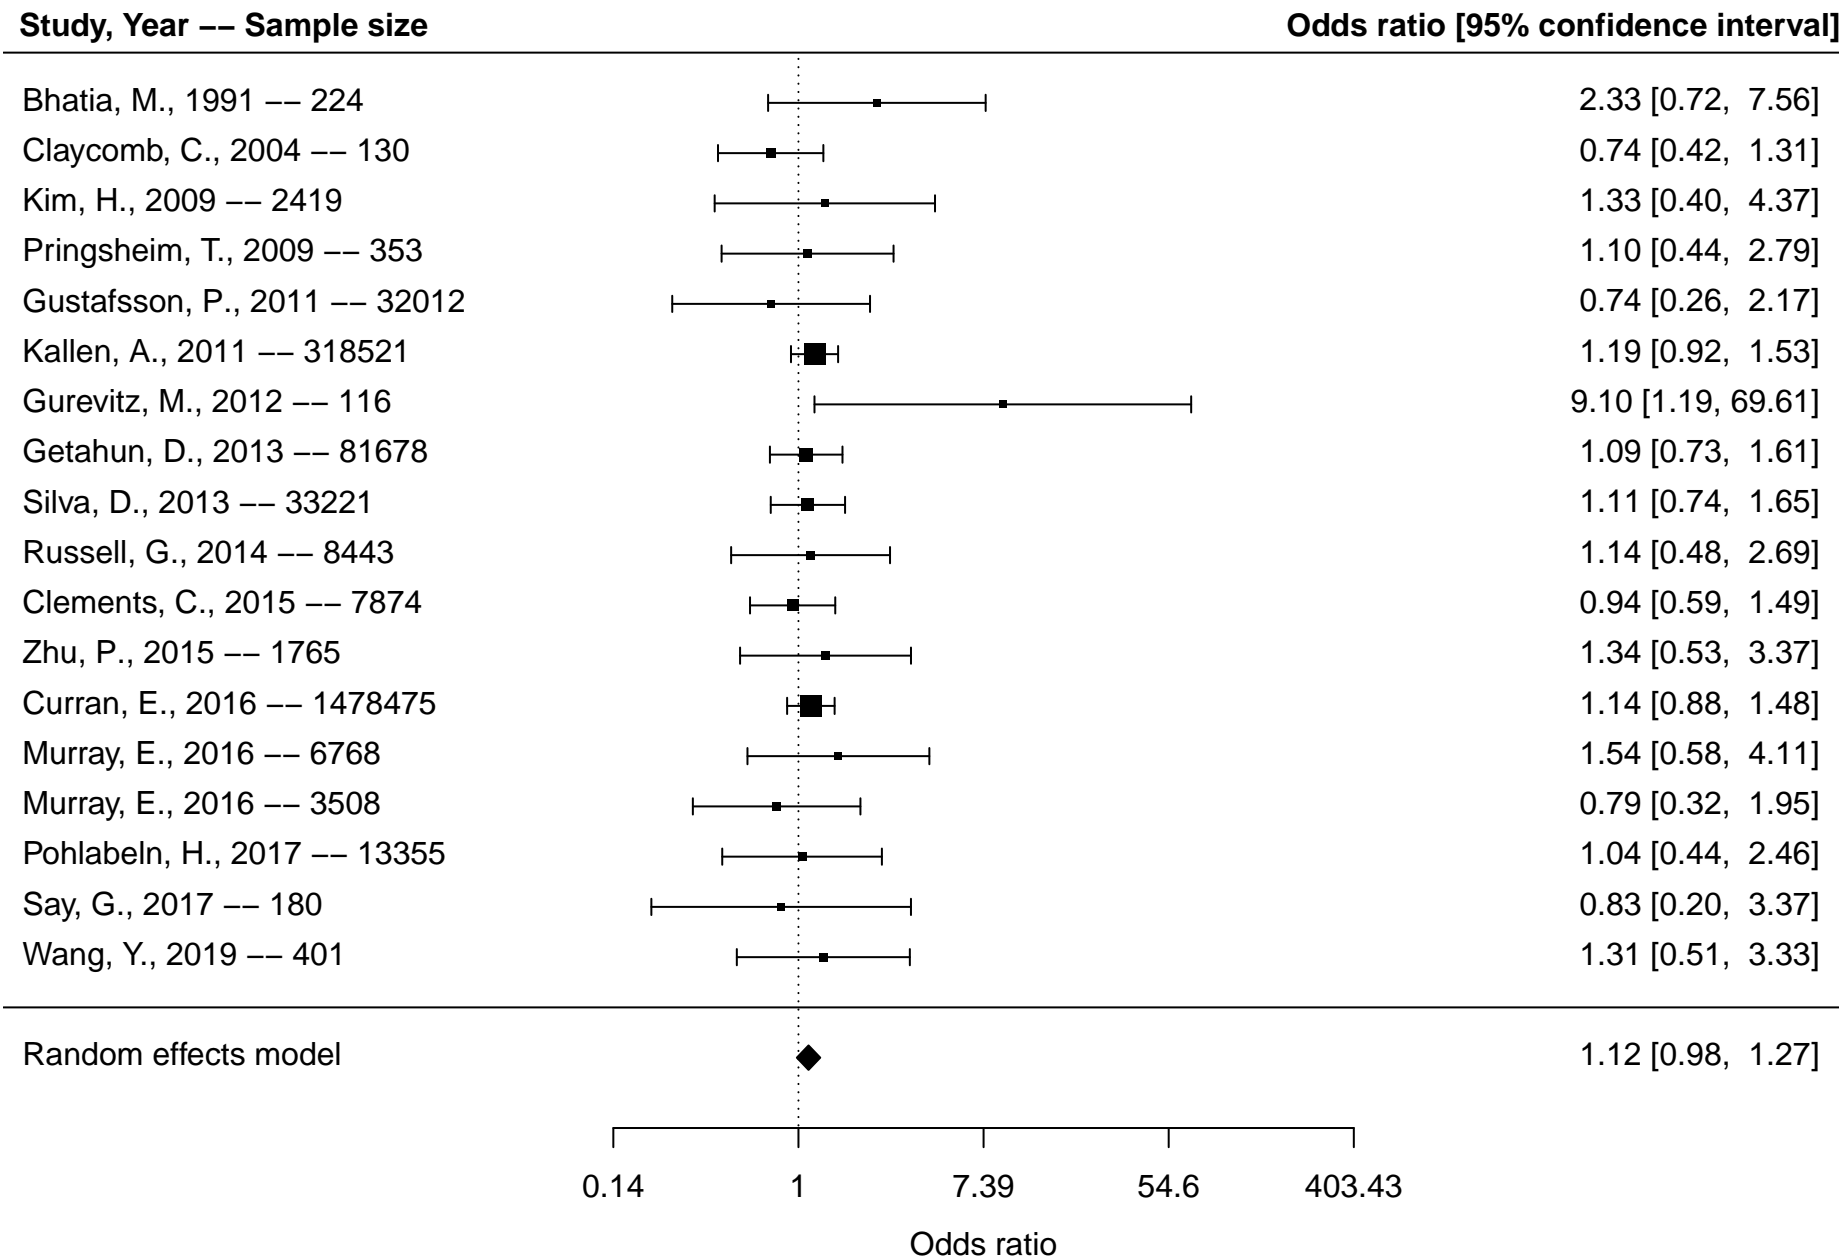



**Figure S16.** Forest plot of meta-analysis of breech delivery and attention-deficit/hyperactivity disorder (ADHD) overall\* based on studies reporting dichotomous outcomes

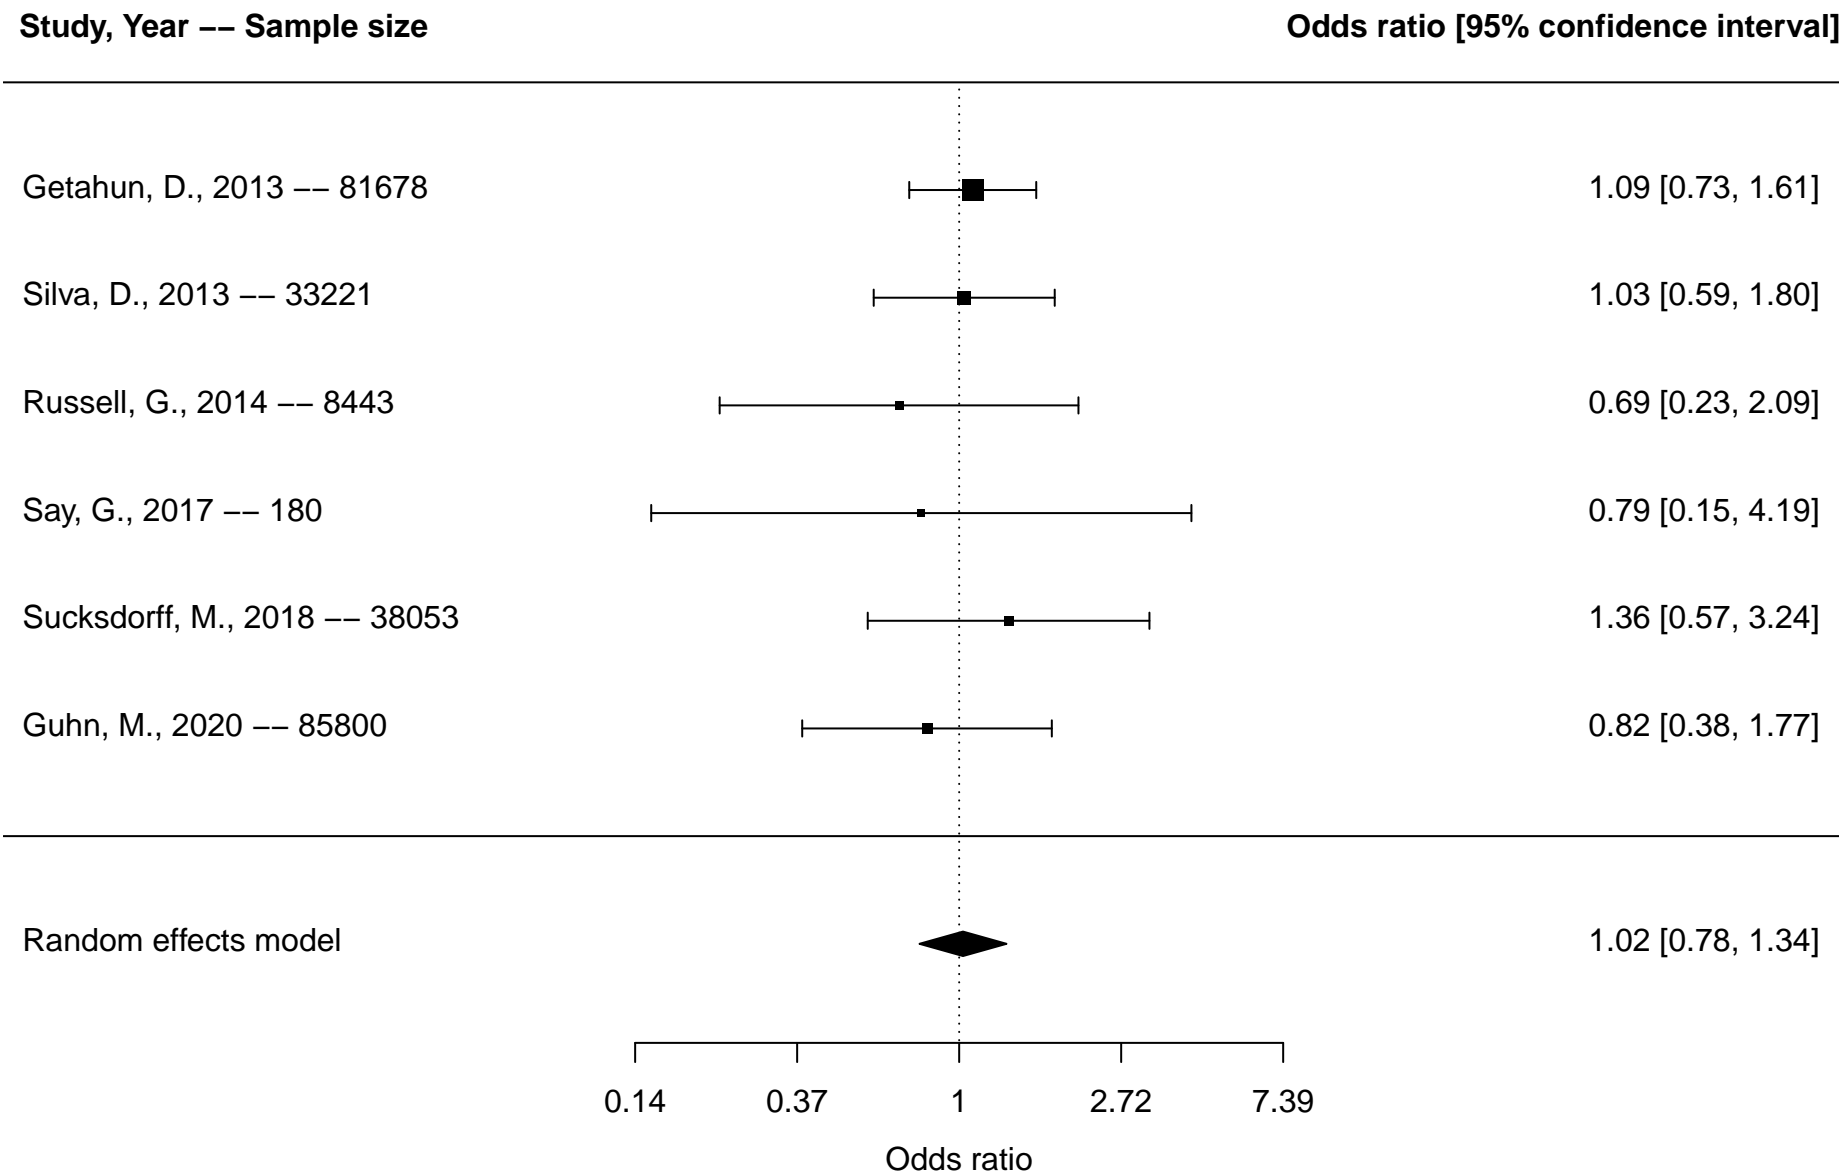

\*Overall includes studies reporting on any included ADHD outcomes (diagnosis, ADHD symptoms, inattention, hyperactivity/impulsivity)

**Figure S17.** Forest plot of meta-analysis of breech delivery and attention-deficit/hyperactivity disorder (ADHD) diagnosis based on studies reporting dichotomous outcomes

**Study, Year -- Sample size**

**Odds ratio [95% confidence interval]**

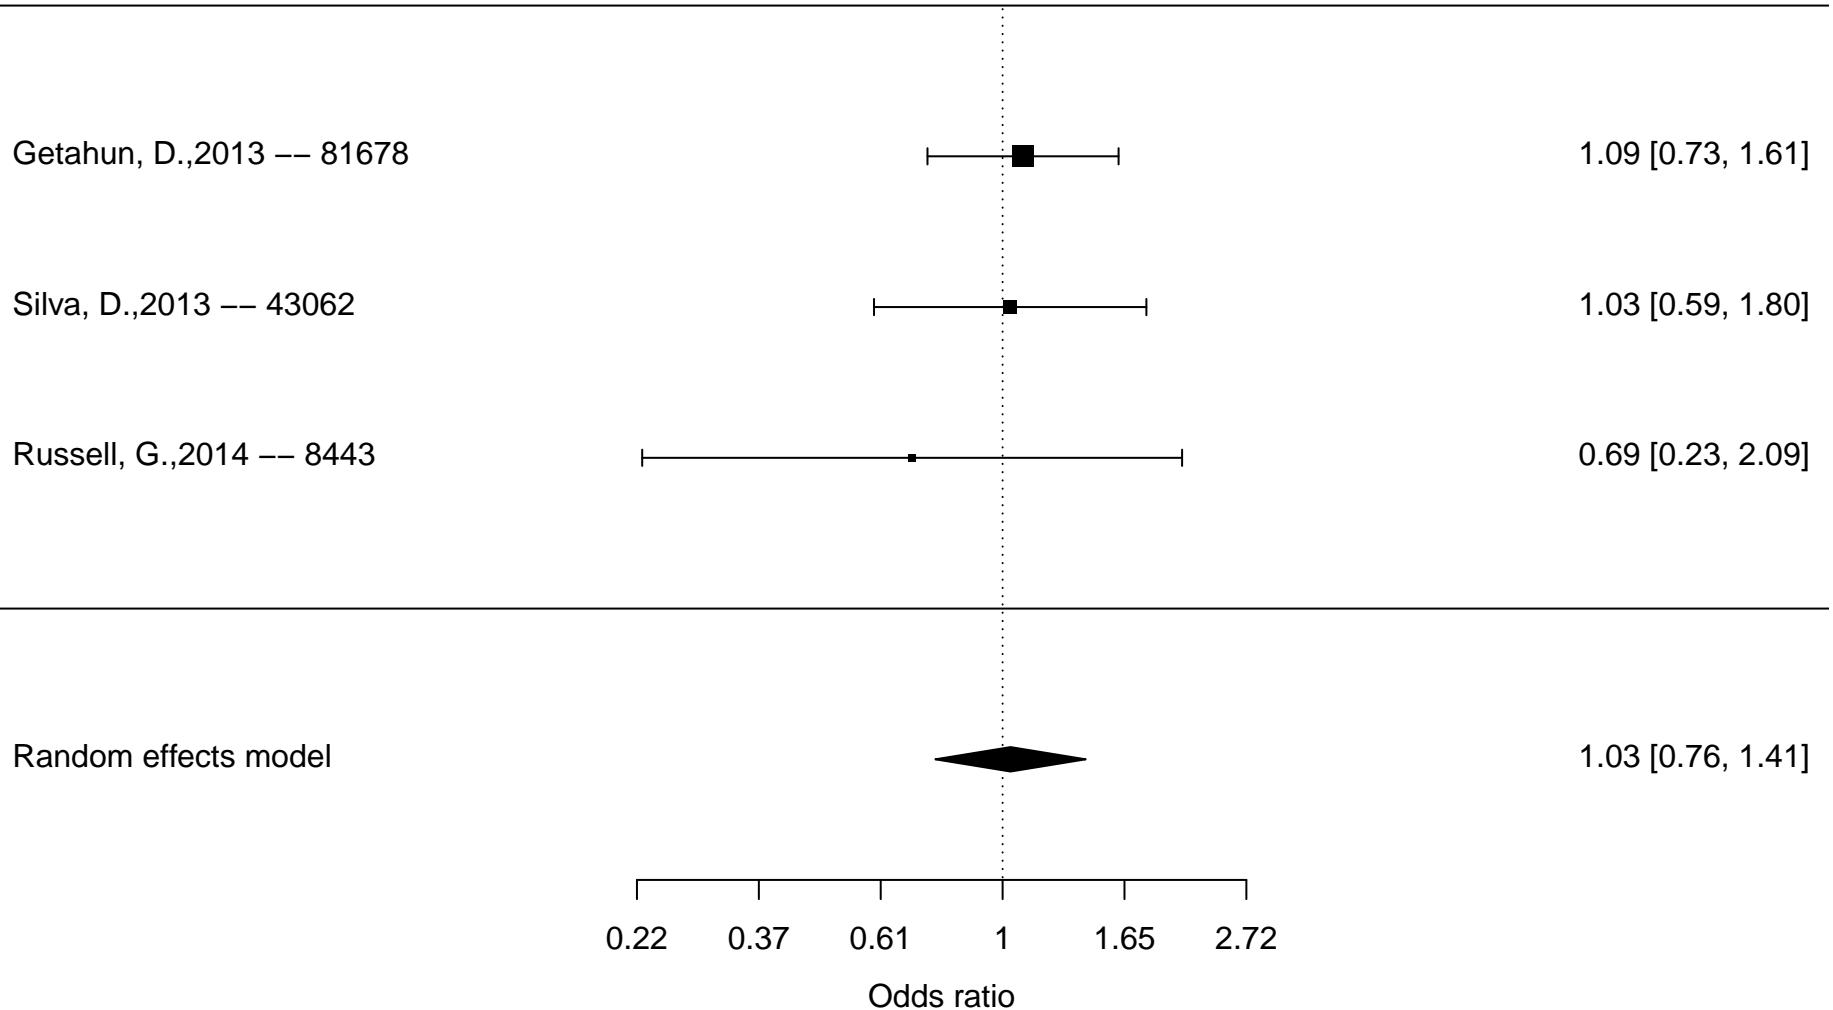

**Figure S18.** Forest plot of meta-analysis of cesarean delivery and attention-deficit/hyperactivity disorder (ADHD) overall\* based on studies reporting dichotomous outcomes

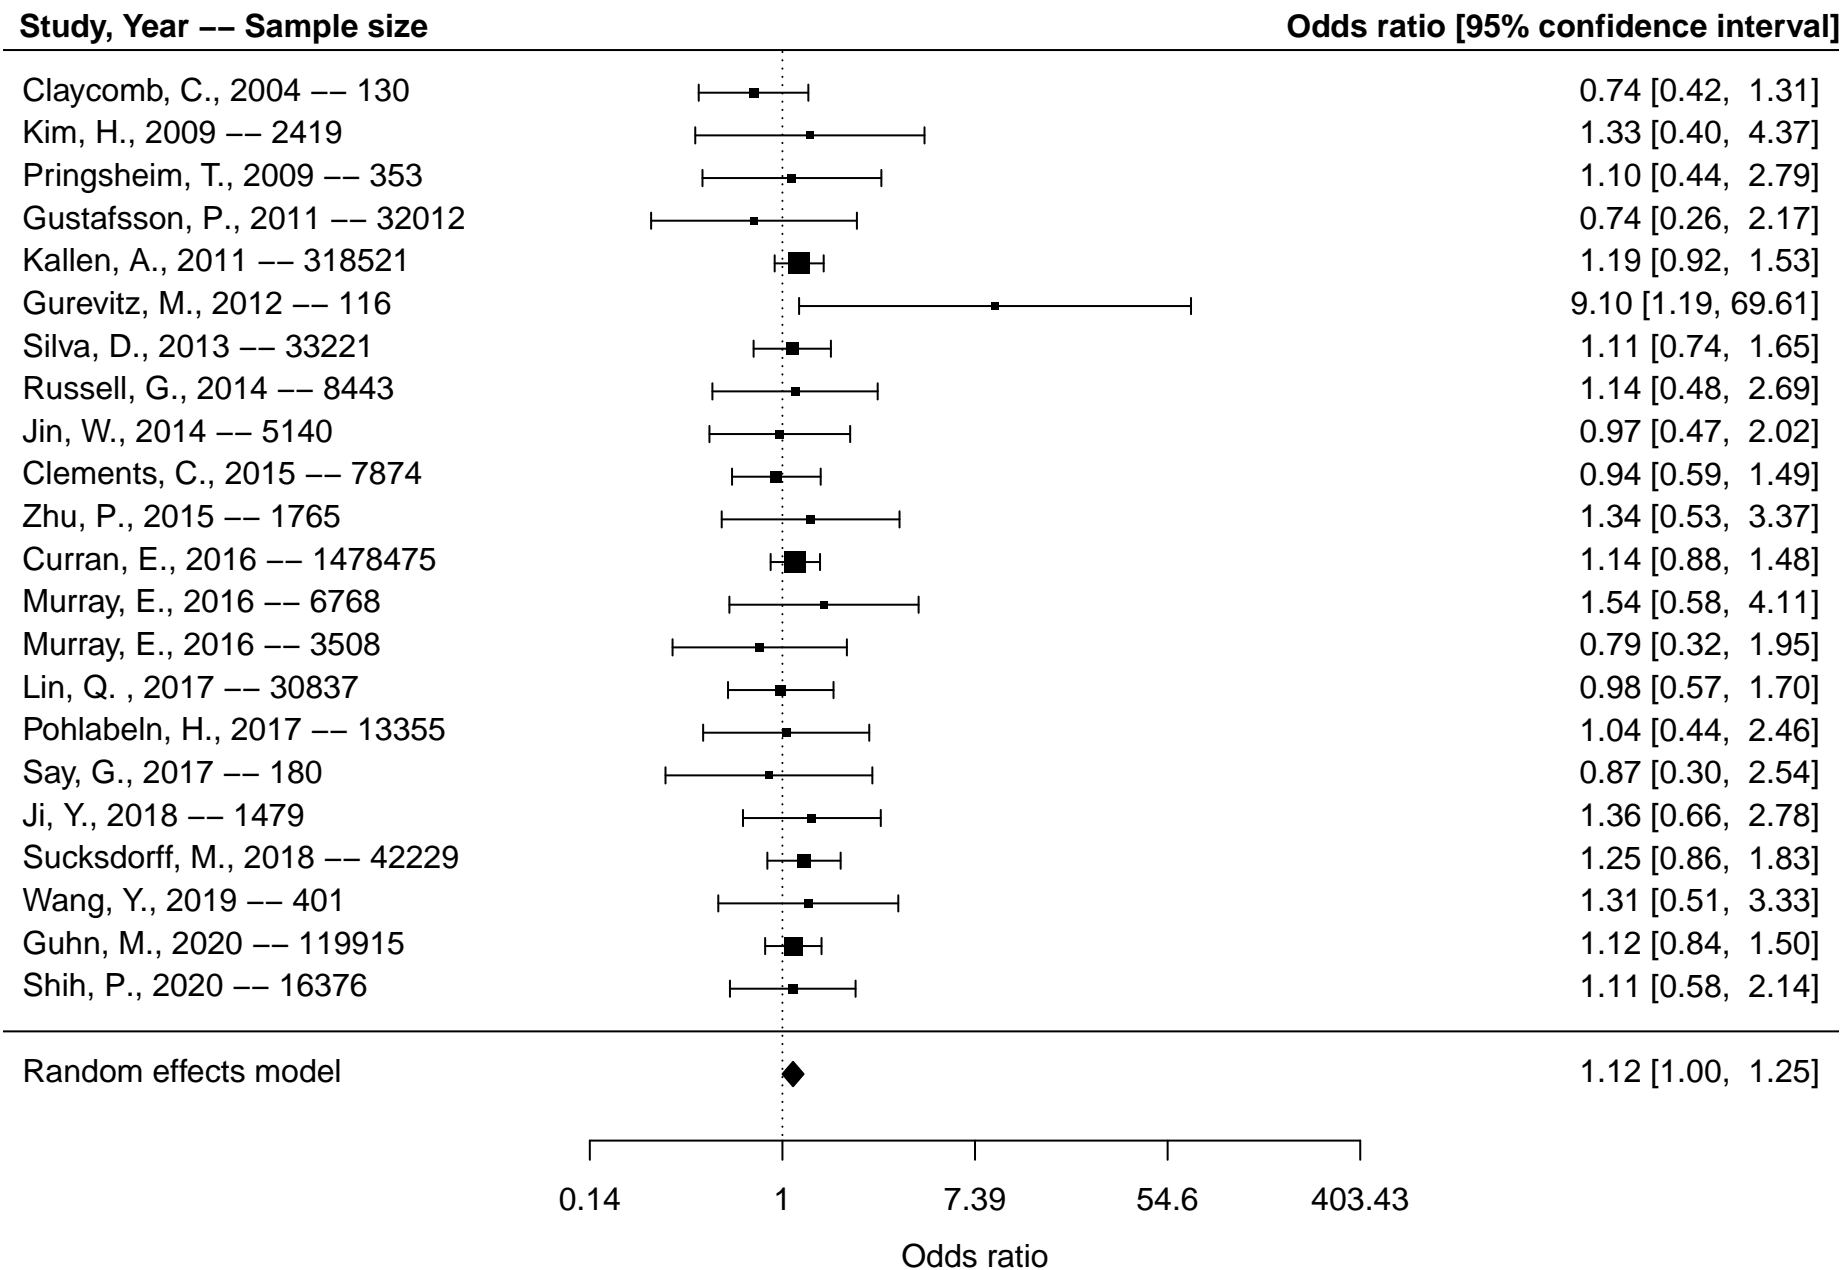

\*Overall includes studies reporting on any included ADHD outcomes (diagnosis, ADHD symptoms, inattention, hyperactivity/impulsivity)

**Figure S19.** Forest plot of meta-analysis of vacuum delivery and attention-deficit/hyperactivity disorder (ADHD) overall\* based on studies reporting dichotomous outcomes

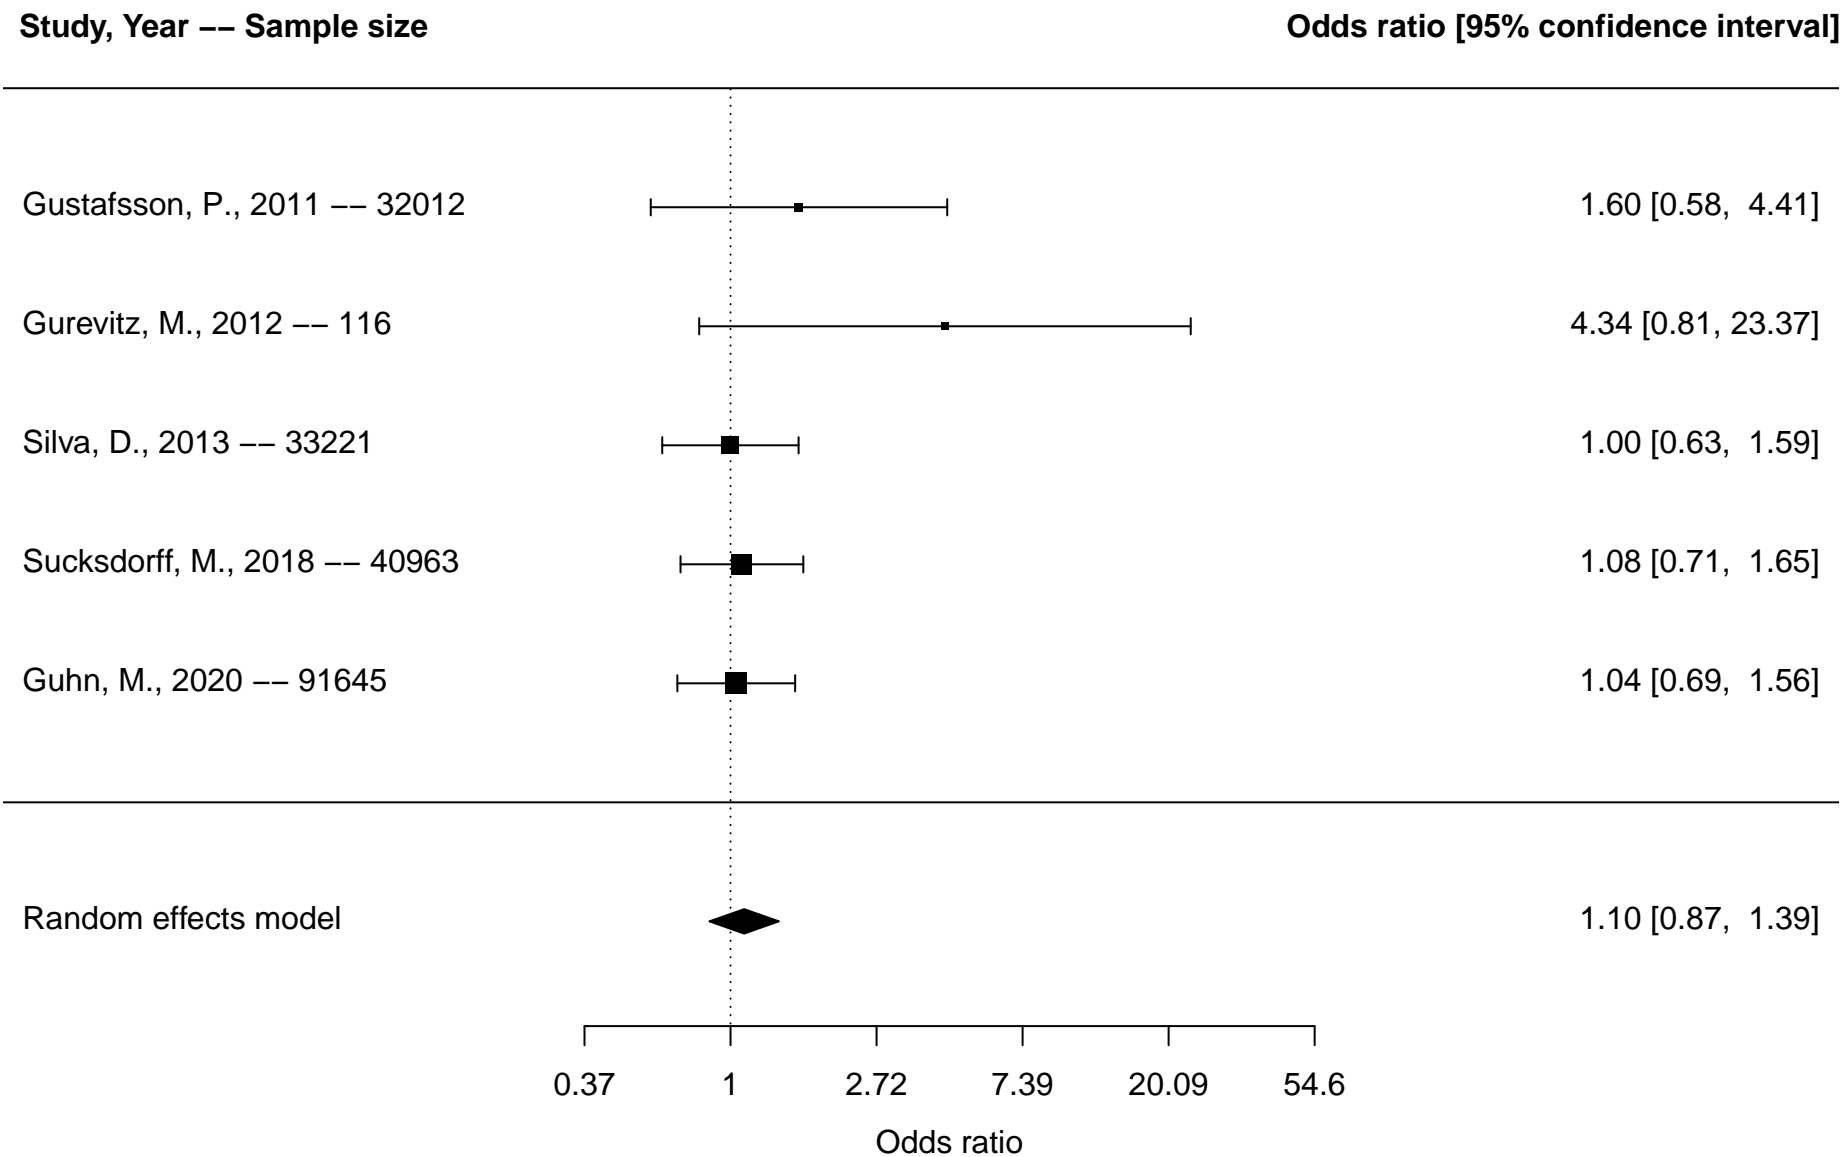

\*Overall includes studies reporting on any included ADHD outcomes (diagnosis, ADHD symptoms, inattention, hyperactivity/impulsivity)

**Figure S20.** Forest plot of meta-analysis of Apgar score and attention-deficit/hyperactivity disorder (ADHD) overall\* based on studies reporting dichotomous outcomes

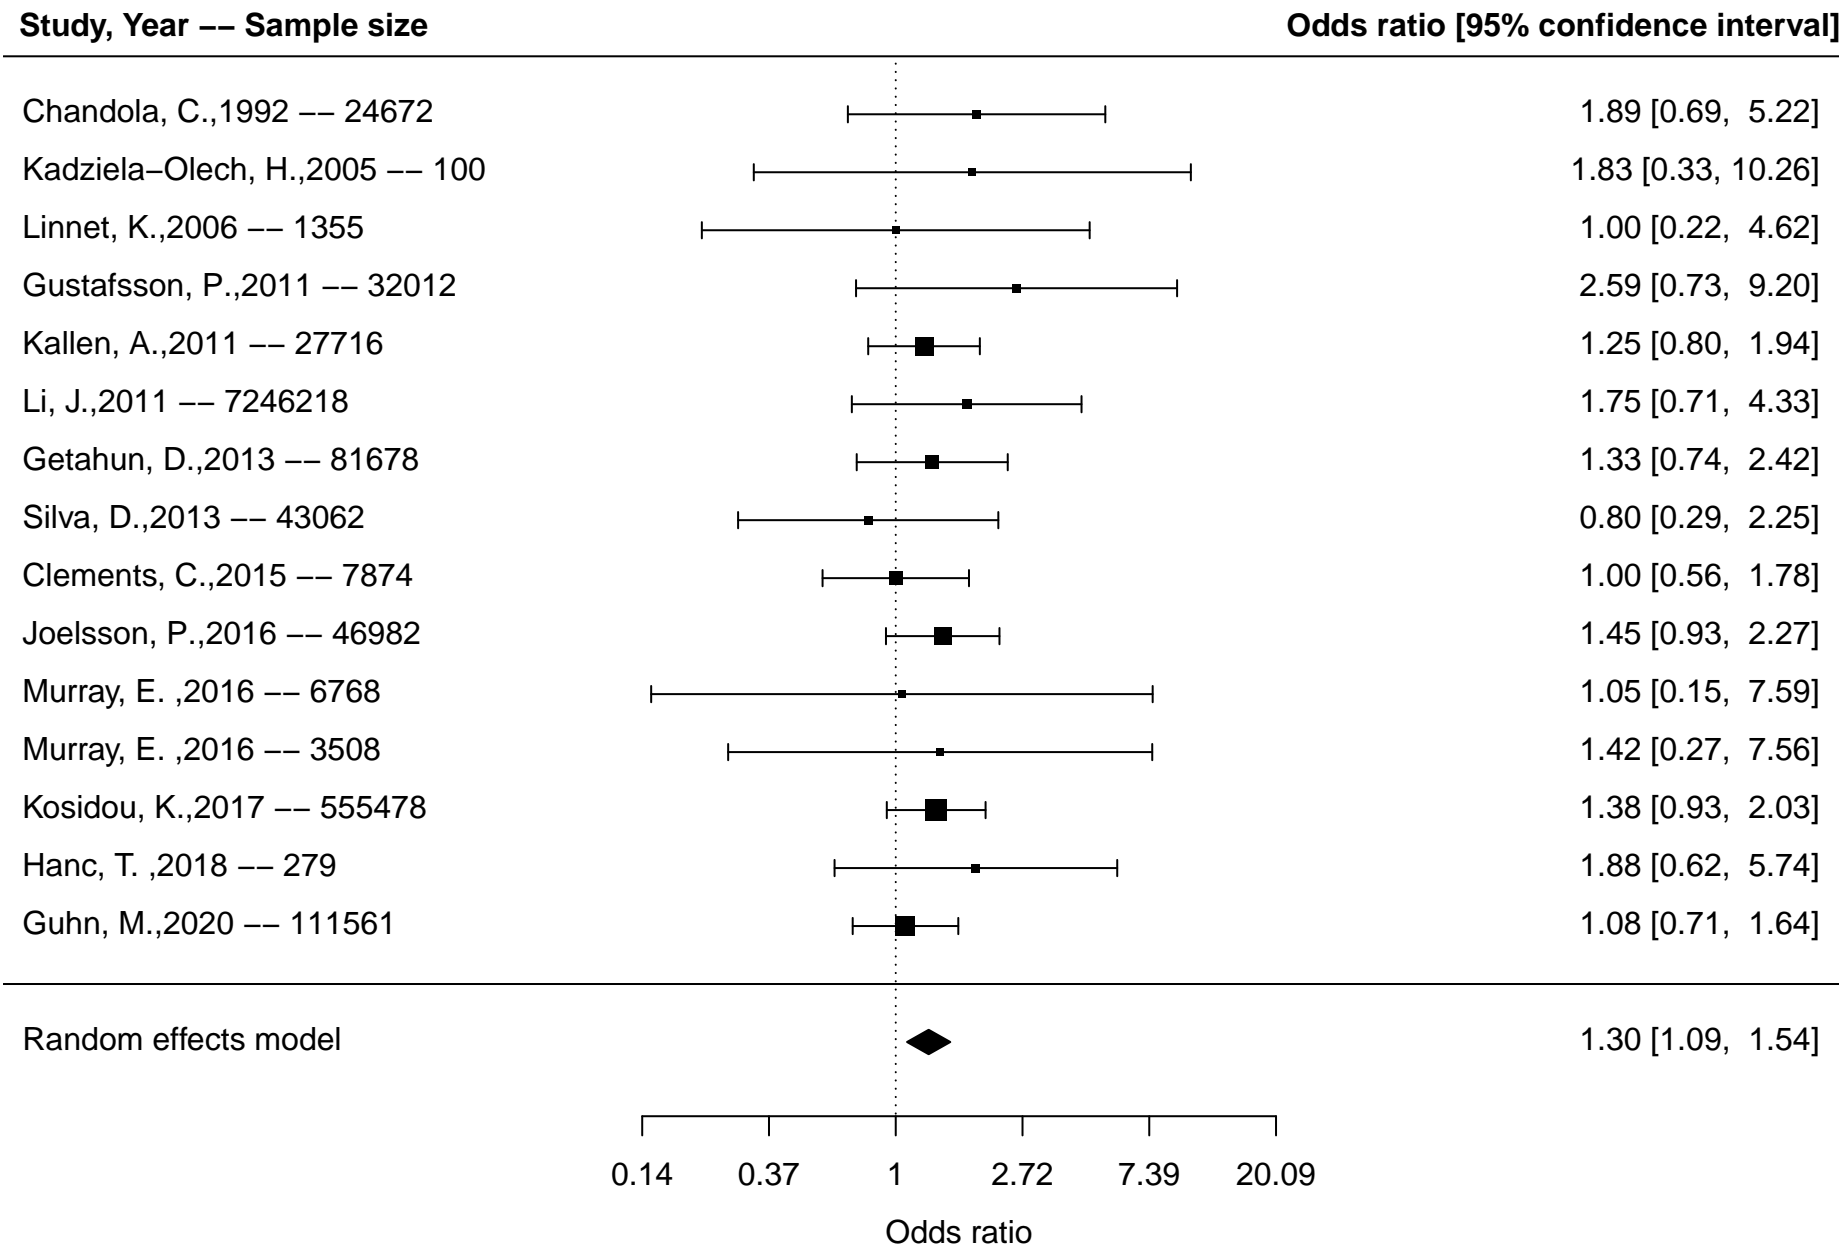

\*Overall includes studies reporting on any included ADHD outcomes (diagnosis, ADHD symptoms, inattention, hyperactivity/impulsivity)

**Figure S21.** Forest plot of meta-analysis of Apgar score and attention-deficit/hyperactivity disorder (ADHD) diagnosis based on studies reporting dichotomous outcomes

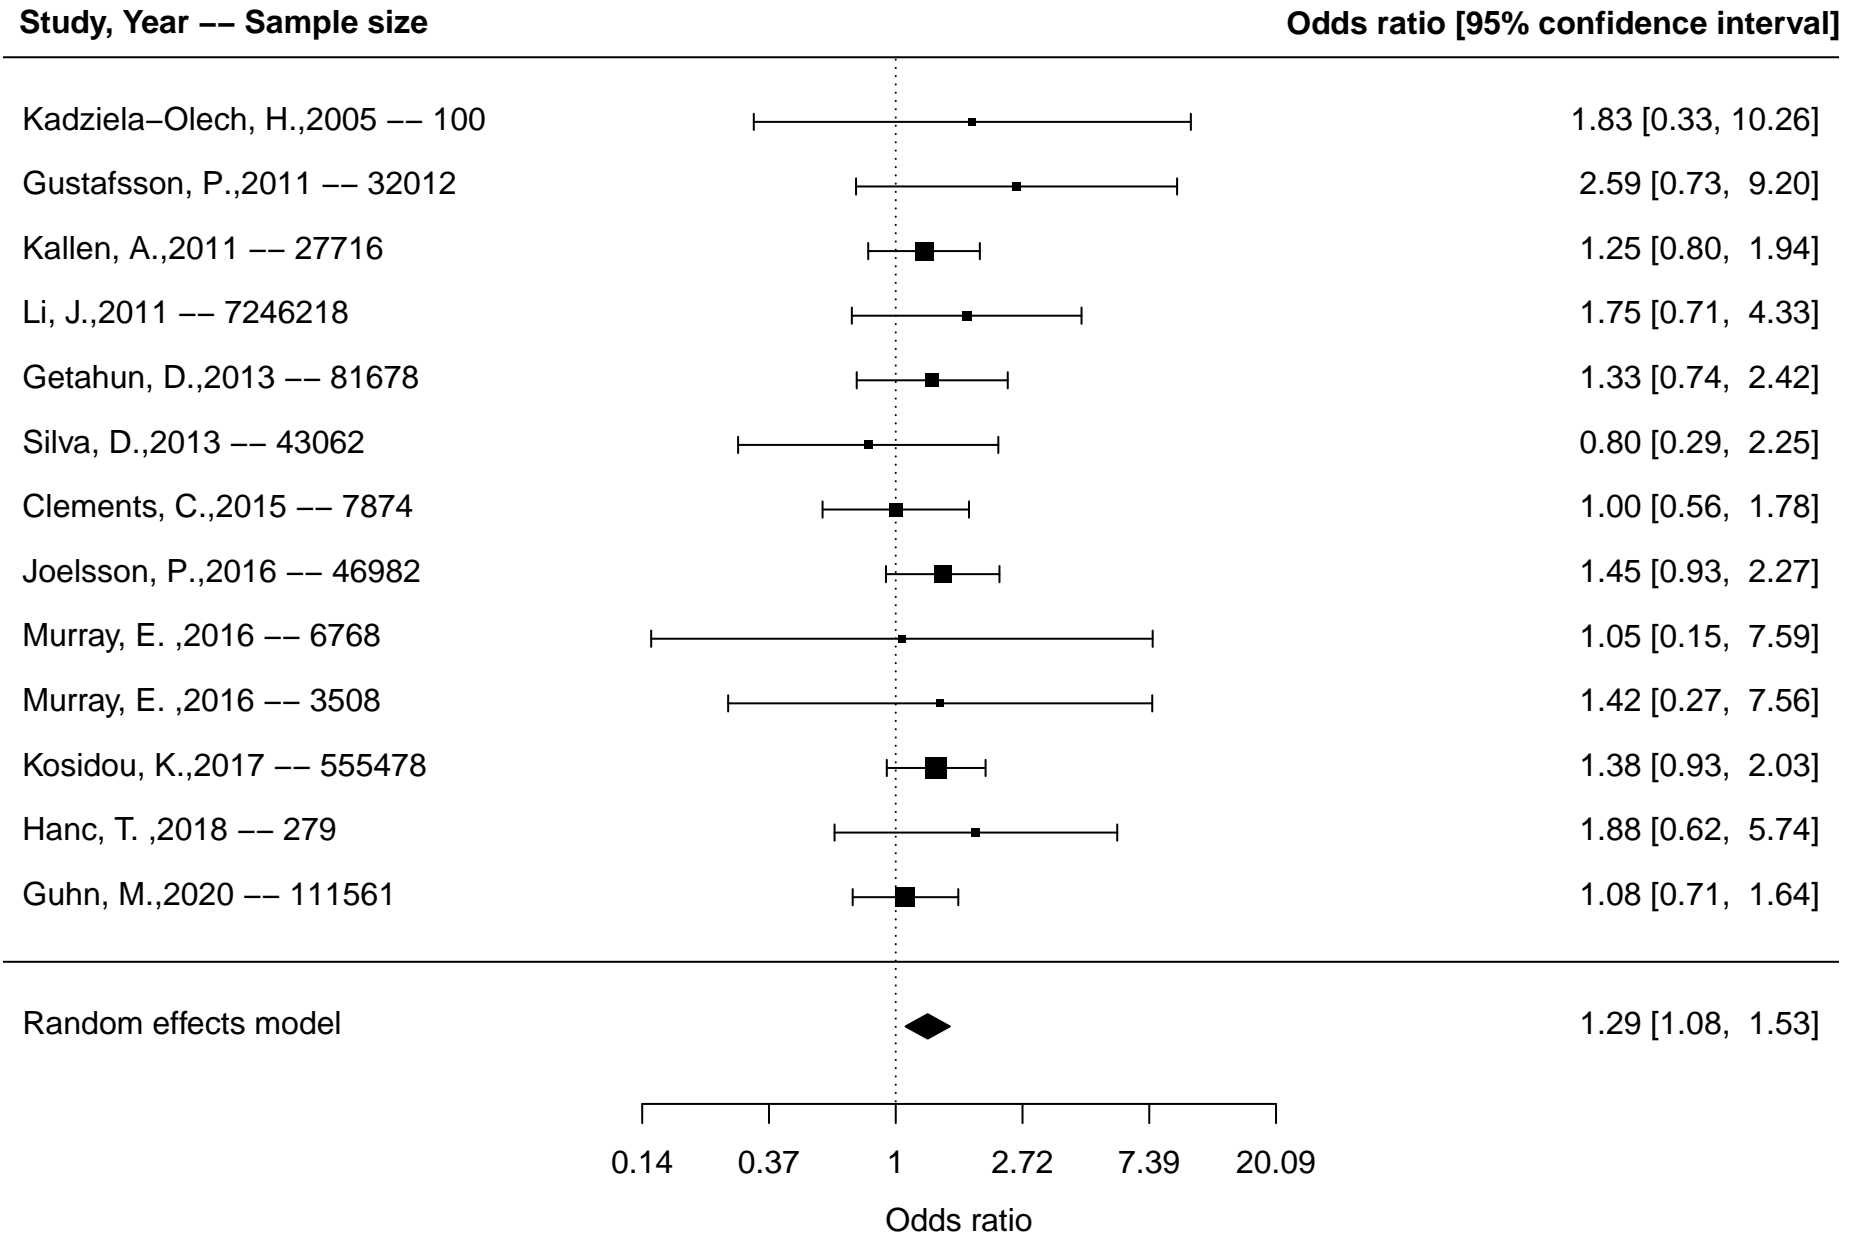

**Figure S22.** Forest plot of meta-analysis of neonatal illness and attention-deficit/hyperactivity disorder (ADHD) overall\* based on studies reporting dichotomous outcomes

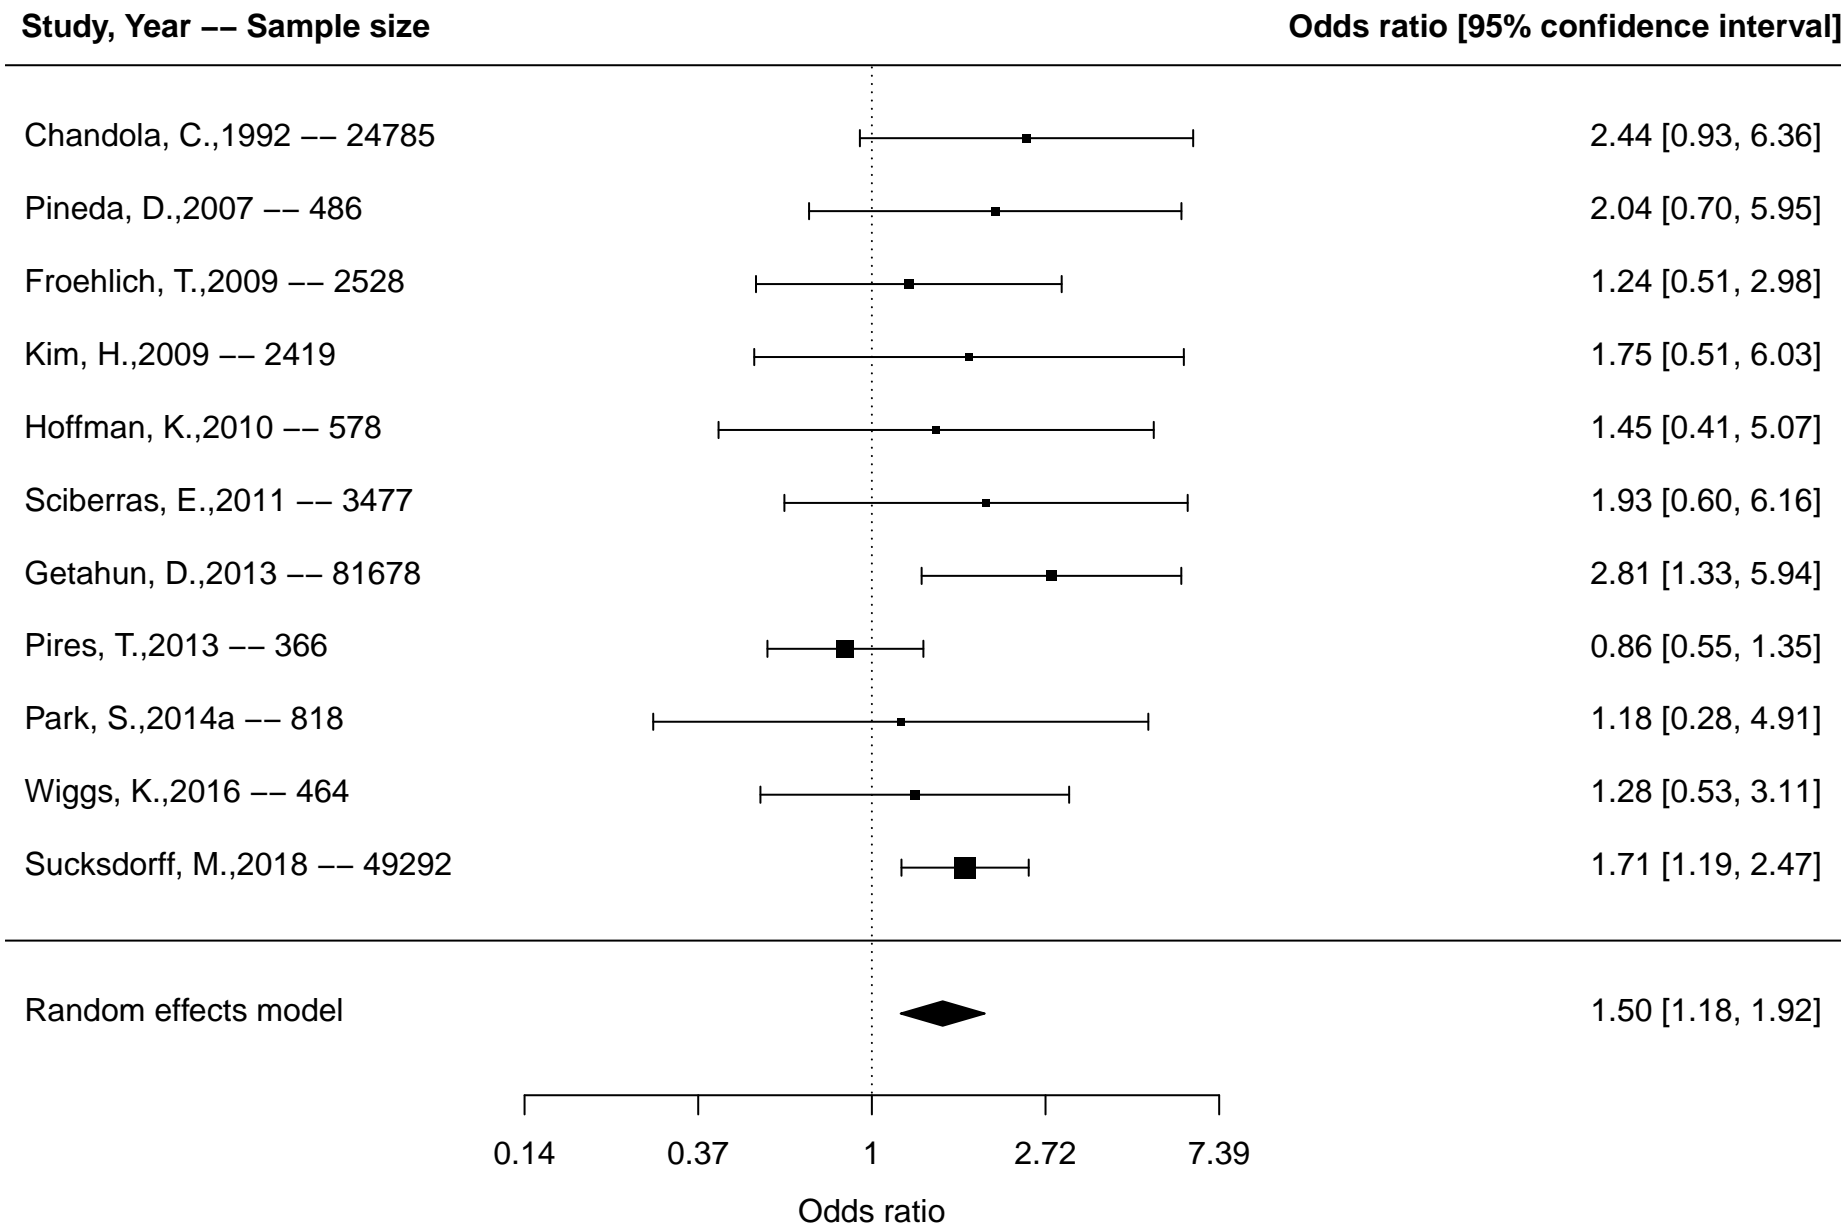

\*Overall includes studies reporting on any included ADHD outcomes (diagnosis, ADHD symptoms, inattention, hyperactivity/impulsivity)

**Figure S23.** Forest plot of meta-analysis of neonatal illness and attention-deficit/hyperactivity disorder (ADHD) diagnosis based on studies reporting dichotomous outcomes

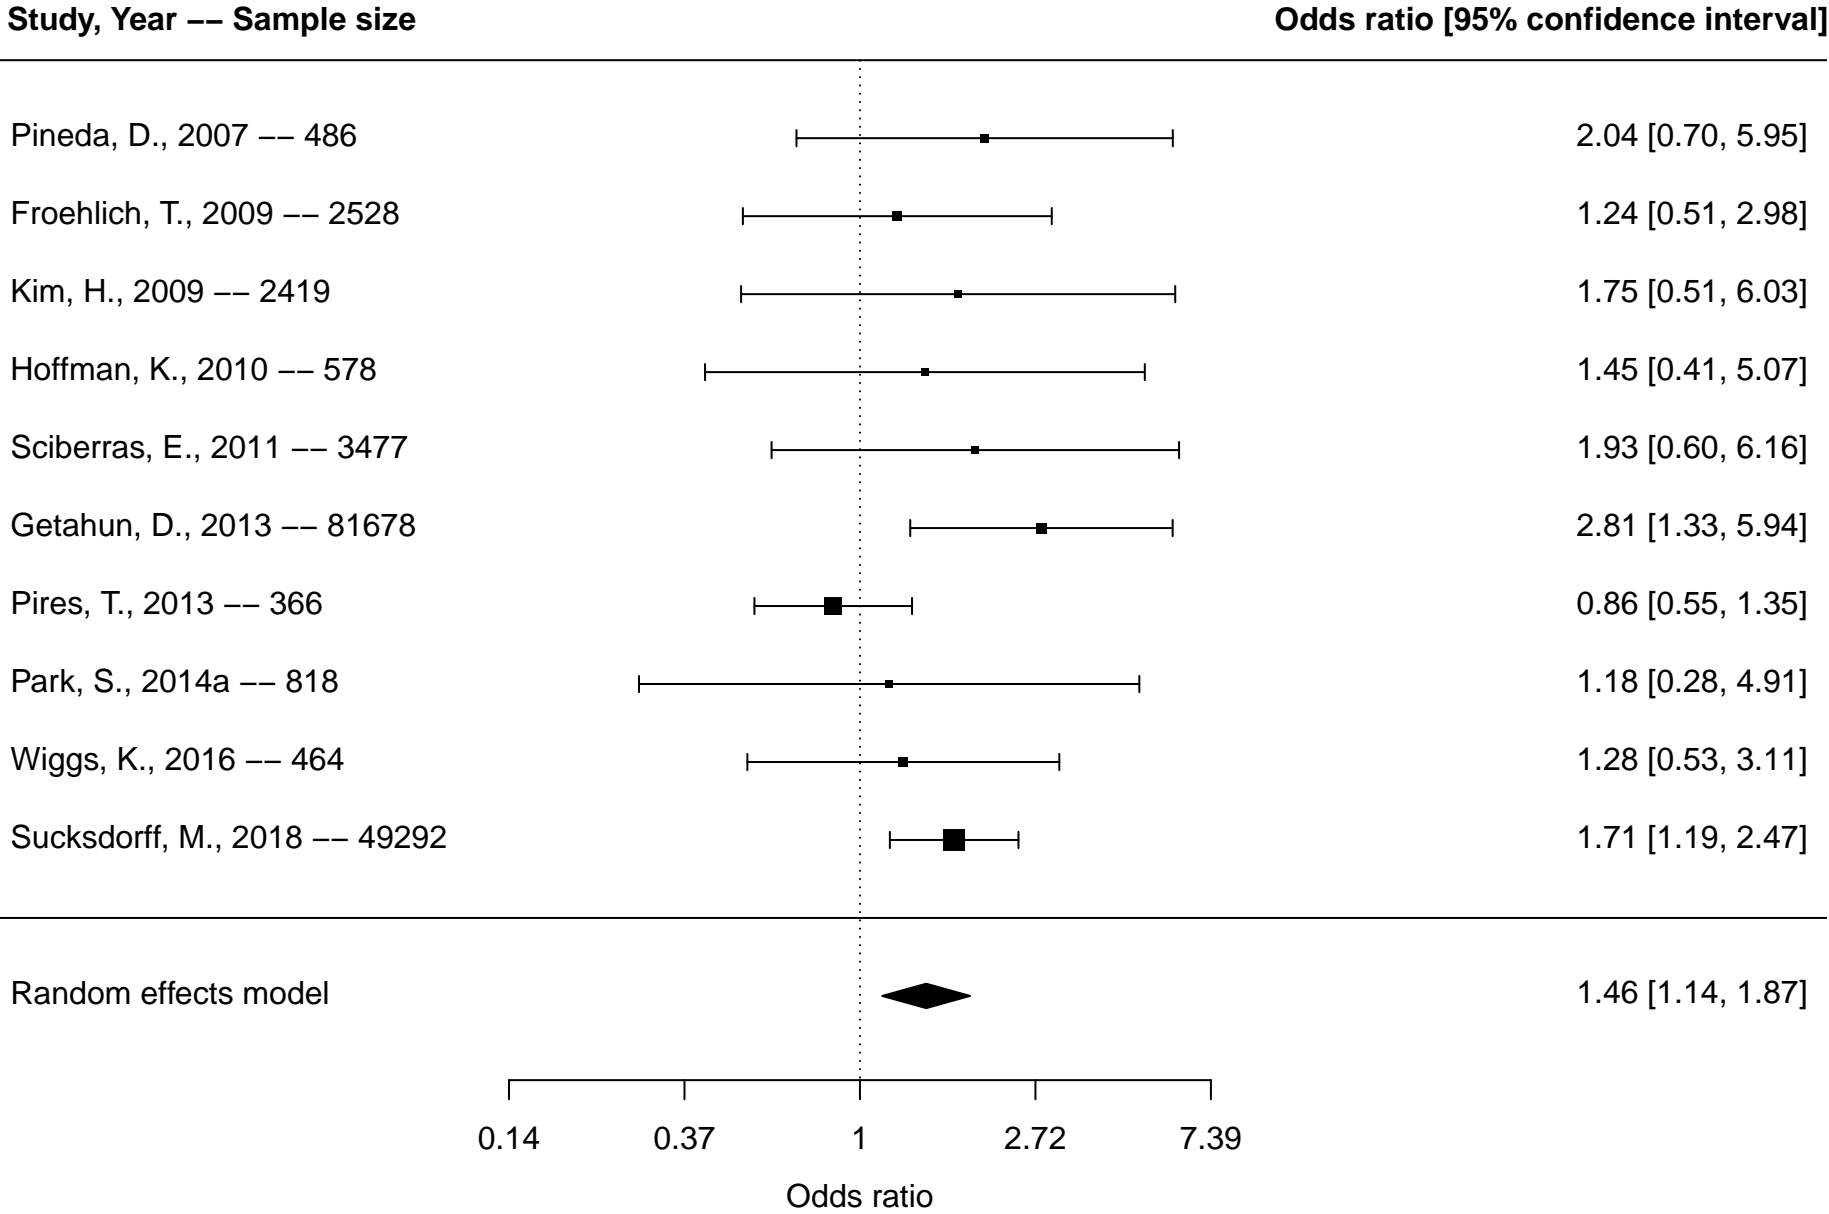



**Figure S24.** Forest plot of meta-analysis of neonatal illness and attention-deficit/hyperactivity disorder (ADHD) overall\* based on studies reporting continuous outcomes

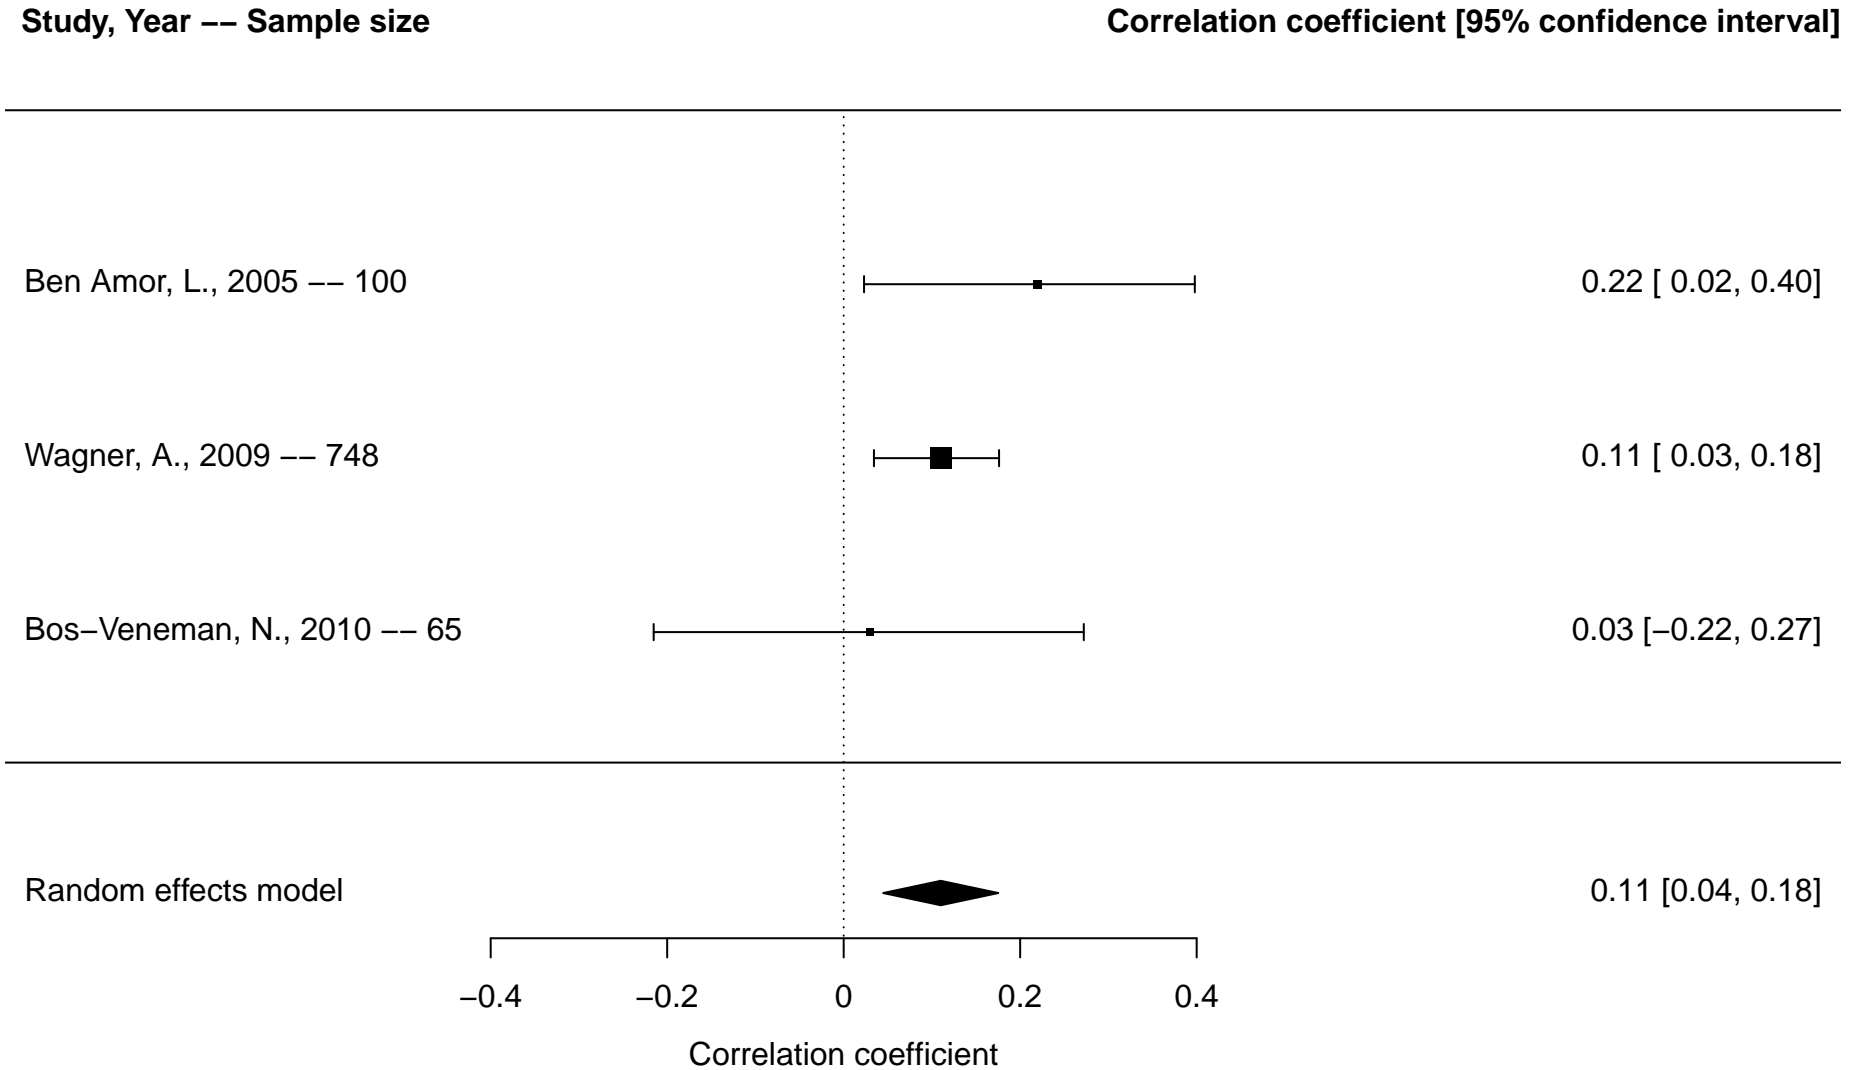

\*Overall includes studies reporting on any included ADHD outcomes (diagnosis, ADHD symptoms, inattention, hyperactivity/impulsivity)

**Figure S25.** Forest plot of meta-analysis of no breastfeeding and attention-deficit/hyperactivity disorder (ADHD) overall\* based on studies reporting dichotomous outcomes

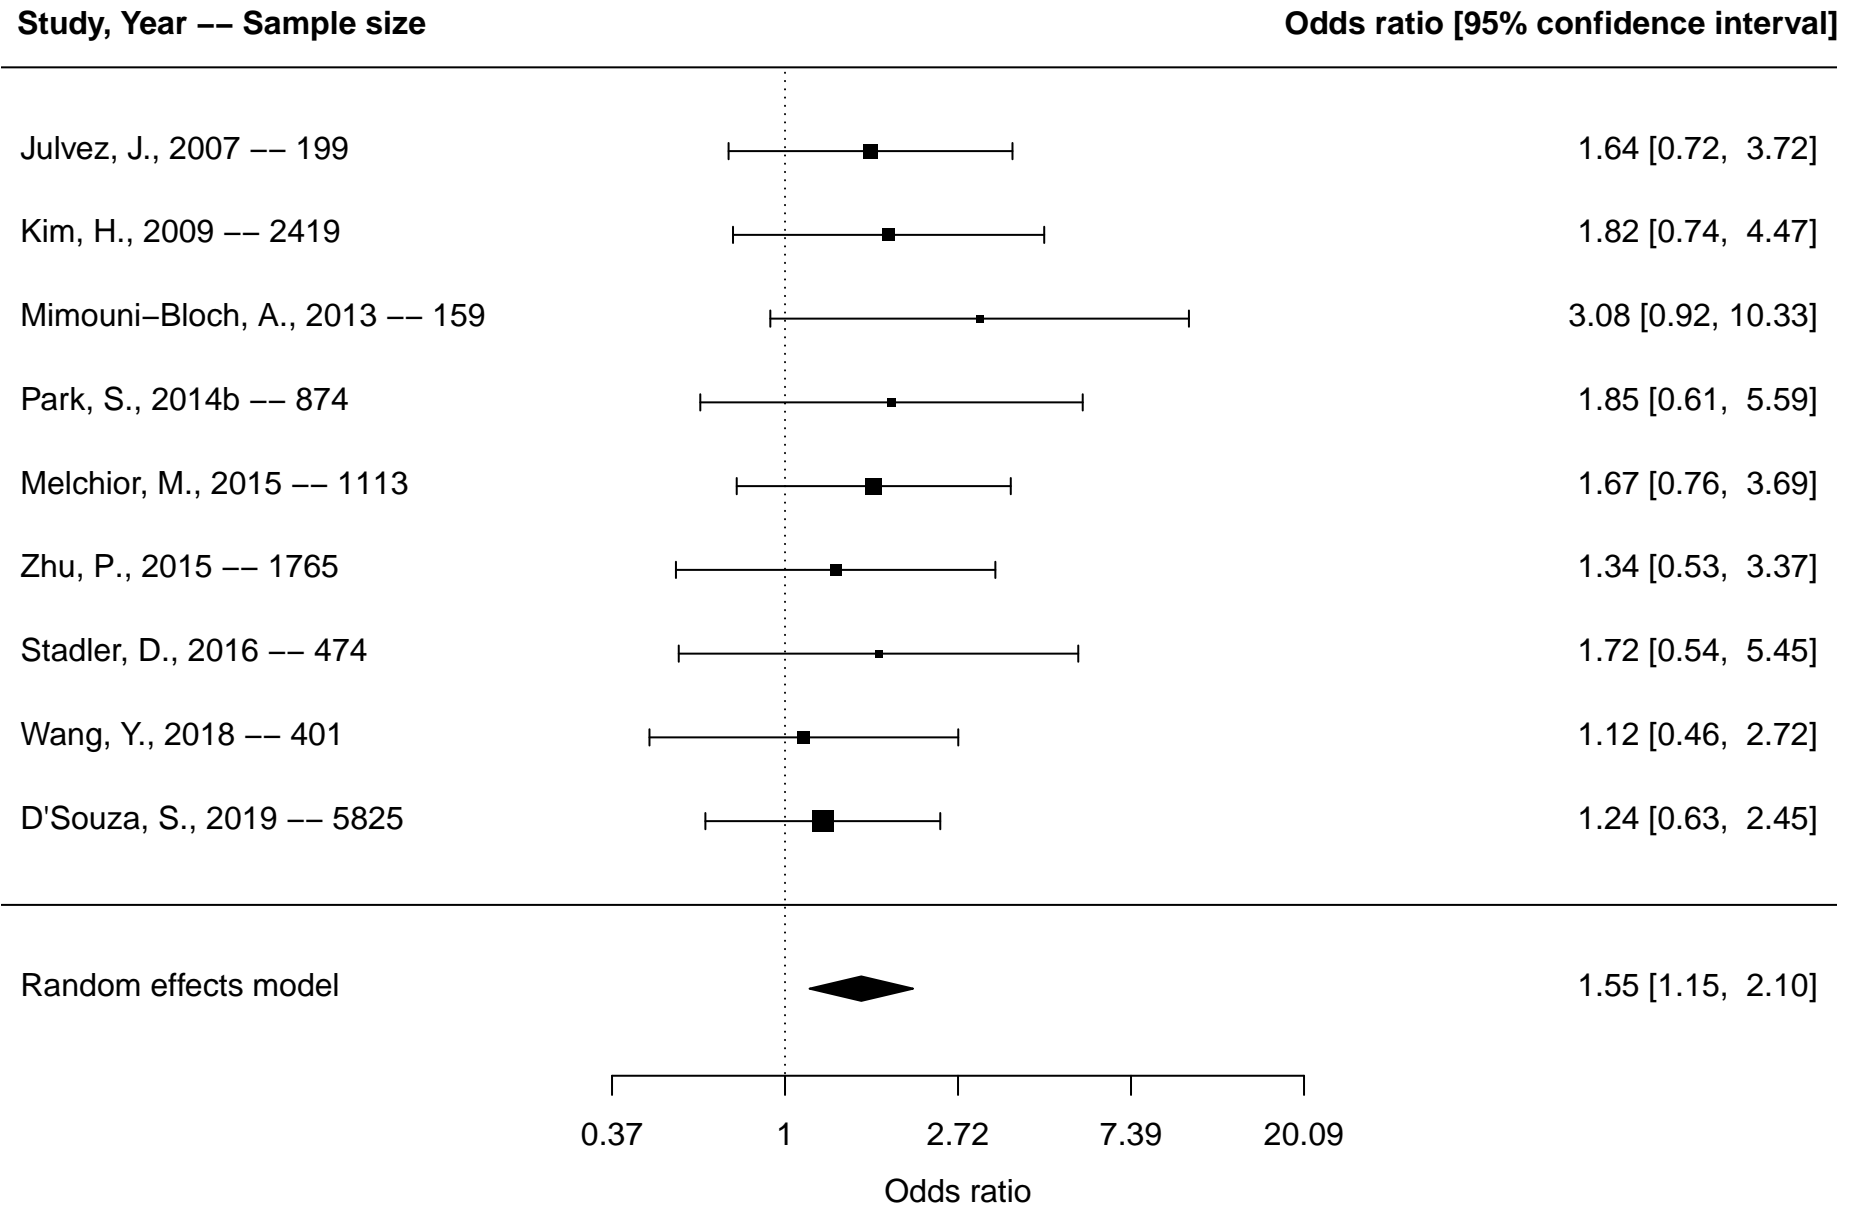

\*Overall includes studies reporting on any included ADHD outcomes (diagnosis, ADHD symptoms, inattention, hyperactivity/impulsivity)
